# Supplementary material for: Proteomic Analysis of Excretory-Secretory Products of Heligmosomoides polygyrus Assessed with Next-Generation Sequencing Transcriptomic Information
Source: PubMed Central journal article supplement (PMC3201918; doi:10.1371/journal.pntd.0001370), 2011-10-25
Supplement: pntd.0001370.s003.pdf [file pntd.0001370.s003.pdf]

**Table S3. Proteins identified in ESP from *H. polygyrus* through search on conceptual translation from RNA-seq assembly.**

| Protein name                                  | Blast2GO Seq. Description                                                | Protein accession numbers                                                                                                                                      | Protein identification probability |
|-----------------------------------------------|--------------------------------------------------------------------------|----------------------------------------------------------------------------------------------------------------------------------------------------------------|------------------------------------|
| Locus_272_Transcript_4/4_Confidence_0.700_3   | venom-allergen-like protein family member (vap-1)                        | Locus_272_Transcript_4_0.700_3                                                                                                                                 | 100.00%                            |
| Locus_566_Transcript_2/6_Confidence_0.476_3   | globin                                                                   | Locus_566_Transcript_2_0.476_3, Locus_566_Transcript_3_0.571_3, Locus_566_Transcript_4_0.524_3, Locus_566_Transcript_5_0.762_2, Locus_566_Transcript_6_0.762_3 | 100.00%                            |
| Locus_120_Transcript_1/8_Confidence_0.410_1   | secreted protein asp-2                                                   | Locus_120_Transcript_1_0.410_1, Locus_120_Transcript_5_0.436_1, Locus_120_Transcript_8_0.462_1                                                                 | 100.00%                            |
| Locus_384_Transcript_8/9_Confidence_0.306_5   | globin                                                                   | Locus_384_Transcript_8_0.306_5                                                                                                                                 | 100.00%                            |
| Locus_2405_Transcript_4/4_Confidence_0.700_4  | secreted protein asp-2                                                   | Locus_2405_Transcript_4_0.700_4                                                                                                                                | 100.00%                            |
| Locus_2261_Transcript_1/1_Confidence_1.000_4  | globin                                                                   | Locus_2261_Transcript_1_1.000_4                                                                                                                                | 100.00%                            |
| Locus_73_Transcript_5/5_Confidence_0.619_4    | vit-2                                                                    | Locus_73_Transcript_5_0.619_4                                                                                                                                  | 100.00%                            |
| Locus_94_Transcript_3/4_Confidence_0.429_4    | elegans protein confirmed by transcript evidence                         | Locus_94_Transcript_3_0.429_4, Locus_94_Transcript_4_0.429_1                                                                                                   | 100.00%                            |
| Locus_122_Transcript_10/10_Confidence_0.312_3 | vitellogenin structural genes (yolk protein genes) family member (vit-2) | Locus_122_Transcript_10_0.312_3                                                                                                                                | 100.00%                            |
| Locus_2367_Transcript_1/3_Confidence_0.375_1  | ll20 15kda ladder antigen                                                | Locus_2367_Transcript_1_0.375_1                                                                                                                                | 100.00%                            |
| Locus_93_Transcript_5/6_Confidence_0.444_2    | vitellogenin structural genes (yolk protein genes) family member (vit-2) | Locus_93_Transcript_5_0.444_2                                                                                                                                  | 100.00%                            |
| Locus_207_Transcript_17/20_Confidence_0.196_1 | briggsae cbr-vit-5 protein                                               | Locus_207_Transcript_17_0.196_1                                                                                                                                | 100.00%                            |
| Locus_290_Transcript_3/3_Confidence_0.833_3   | briggsae cbr-vit-2 protein                                               | Locus_290_Transcript_3_0.833_3                                                                                                                                 | 100.00%                            |
| Locus_211_Transcript_5/5_Confidence_0.765_5   | vitellogenin structural genes (yolk protein genes) family member (vit-6) | Locus_211_Transcript_5_0.765_5                                                                                                                                 | 100.00%                            |

|                                               |                                                                          |                                                                  |         |
|-----------------------------------------------|--------------------------------------------------------------------------|------------------------------------------------------------------|---------|
| Locus_3_Transcript_3/3_Confidence_0.875_4     | vitellogenin structural genes (yolk protein genes) family member (vit-2) | Locus_3_Transcript_3_0.875_4                                     | 100.00% |
| Locus_2733_Transcript_1/1_Confidence_1.000_3  | globin                                                                   | Locus_2733_Transcript_1_1.000_3                                  | 100.00% |
| Locus_6303_Transcript_1/1_Confidence_1.000_1  | ancylostoma-secreted protein 1 precursor                                 | Locus_6303_Transcript_1_1.000_1                                  | 99.80%  |
| Locus_927_Transcript_1/2_Confidence_1.000_6   | ---NA---                                                                 | Locus_927_Transcript_1_1.000_6, Locus_927_Transcript_2_1.000_4   | 99.80%  |
| Locus_160_Transcript_5/5_Confidence_0.733_4   | secreted protein asp-2                                                   | Locus_160_Transcript_5_0.733_4                                   | 100.00% |
| Locus_407_Transcript_1/2_Confidence_1.000_5   | vitellogenin structural genes (yolk protein genes) family member (vit-6) | Locus_407_Transcript_1_1.000_5                                   | 100.00% |
| Locus_7106_Transcript_1/1_Confidence_1.000_2  | acetylcholinesterase 2                                                   | Locus_7106_Transcript_1_1.000_2                                  | 100.00% |
| Locus_21253_Transcript_1/1_Confidence_1.000_5 | secreted protein 5 precursor                                             | Locus_21253_Transcript_1_1.000_5                                 | 100.00% |
| Locus_420_Transcript_1/1_Confidence_1.000_1   | venom-allergen-like protein family member (vap-1)                        | Locus_420_Transcript_1_1.000_1                                   | 100.00% |
| Locus_2033_Transcript_1/1_Confidence_1.000_4  | globin                                                                   | Locus_2033_Transcript_1_1.000_4                                  | 100.00% |
| Locus_391_Transcript_1/2_Confidence_1.000_3   | large subunit ribosomal protein 6                                        | Locus_391_Transcript_1_1.000_3, Locus_391_Transcript_2_1.000_2   | 100.00% |
| Locus_1550_Transcript_1/1_Confidence_1.000_1  | briggsae cbr-vit-6 protein                                               | Locus_1550_Transcript_1_1.000_1, Locus_51_Transcript_1_1.000_5   | 100.00% |
| Locus_1900_Transcript_4/6_Confidence_0.667_6  | calcium activated nucleotidase 1                                         | Locus_1900_Transcript_4_0.667_6, Locus_1900_Transcript_6_0.667_6 | 100.00% |
| Locus_633_Transcript_3/4_Confidence_0.444_5   | briggsae cbr-vit-6 protein                                               | Locus_633_Transcript_3_0.444_5                                   | 100.00% |
| Locus_4583_Transcript_1/1_Confidence_1.000_5  | venom-allergen-like protein family member (vap-1)                        | Locus_4583_Transcript_1_1.000_5                                  | 100.00% |

|                                               |                                                                          |                                                                                                |         |
|-----------------------------------------------|--------------------------------------------------------------------------|------------------------------------------------------------------------------------------------|---------|
| Locus_541_Transcript_1/4_Confidence_0.692_4   | enolase                                                                  | Locus_541_Transcript_1_0.692_4, Locus_541_Transcript_3_0.692_4, Locus_541_Transcript_4_0.692_4 | 100.00% |
| Locus_5904_Transcript_1/1_Confidence_1.000_4  | secreted protein asp-2                                                   | Locus_5904_Transcript_1_1.000_4                                                                | 100.00% |
| Locus_6562_Transcript_1/1_Confidence_1.000_4  | ---NA---                                                                 | Locus_6562_Transcript_1_1.000_4                                                                | 99.80%  |
| Locus_7877_Transcript_1/1_Confidence_1.000_4  | ---NA---                                                                 | Locus_7877_Transcript_1_1.000_4                                                                | 100.00% |
| Locus_97_Transcript_13/17_Confidence_0.302_6  | secreted protein 5 precursor                                             | Locus_97_Transcript_13_0.302_6                                                                 | 100.00% |
| Locus_13795_Transcript_1/1_Confidence_1.000_4 | nematode polyprotein allergen related family member (npa-1)              | Locus_13795_Transcript_1_1.000_4                                                               | 100.00% |
| Locus_1878_Transcript_2/2_Confidence_1.000_2  | elegans protein confirmed by transcript evidence                         | Locus_1878_Transcript_2_1.000_2                                                                | 100.00% |
| Locus_2046_Transcript_1/2_Confidence_1.000_1  | secreted protein 5 precursor                                             | Locus_2046_Transcript_1_1.000_1                                                                | 100.00% |
| Locus_3463_Transcript_1/2_Confidence_1.000_1  | elegans protein confirmed by transcript evidence                         | Locus_3463_Transcript_1_1.000_1                                                                | 100.00% |
| Locus_207_Transcript_19/20_Confidence_0.107_3 | vit-2                                                                    | Locus_207_Transcript_19_0.107_3                                                                | 99.80%  |
| Locus_2879_Transcript_1/1_Confidence_1.000_2  | ---NA---                                                                 | Locus_2879_Transcript_1_1.000_2                                                                | 100.00% |
| Locus_3116_Transcript_1/1_Confidence_1.000_4  | annexin a13                                                              | Locus_3116_Transcript_1_1.000_4                                                                | 100.00% |
| Locus_313_Transcript_1/2_Confidence_1.000_2   | briggsae cbr-vit-6 protein                                               | Locus_313_Transcript_1_1.000_2                                                                 | 100.00% |
| Locus_4418_Transcript_1/1_Confidence_1.000_4  | secreted protein asp-2                                                   | Locus_4418_Transcript_1_1.000_4                                                                | 100.00% |
| Locus_564_Transcript_6/7_Confidence_0.167_2   | parasitic stage specific protein 2                                       | Locus_564_Transcript_6_0.167_2                                                                 | 100.00% |
| Locus_630_Transcript_1/3_Confidence_0.375_5   | briggsae cbr-vit-6 protein                                               | Locus_630_Transcript_1_0.375_5, Locus_630_Transcript_2_0.625_5, Locus_630_Transcript_3_0.750_6 | 99.80%  |
| Locus_8762_Transcript_1/1_Confidence_1.000_4  | elegans protein partially confirmed by transcript evidence               | Locus_8762_Transcript_1_1.000_4                                                                | 100.00% |
| Locus_1002_Transcript_1/1_Confidence_1.000_4  | secreted protein 6 precursor                                             | Locus_1002_Transcript_1_1.000_4                                                                | 99.80%  |
| Locus_11_Transcript_14/14_Confidence_0.176_5  | vitellogenin structural genes (yolk protein genes) family member (vit-6) | Locus_11_Transcript_14_0.176_5, Locus_11_Transcript_7_0.176_5                                  | 99.80%  |
| Locus_215_Transcript_2/2_Confidence_1.000_3   | fatty acid-binding protein homolog                                       | Locus_215_Transcript_2_1.000_3                                                                 | 100.00% |

|                                              |                                                   |                                                                                                 |         |
|----------------------------------------------|---------------------------------------------------|-------------------------------------------------------------------------------------------------|---------|
| Locus_2656_Transcript_1/4_Confidence_0.625_3 | acetylcholinesterase 2                            | Locus_2656_Transcript_1_0.625_3,Locus_2656_Transcript_3_0.625_2,Locus_2656_Transcript_4_0.625_2 | 100.00% |
| Locus_498_Transcript_1/2_Confidence_1.000_2  | 14-3-3 protein                                    | Locus_498_Transcript_1_1.000_2                                                                  | 100.00% |
| Locus_1319_Transcript_1/2_Confidence_1.000_3 | elegans protein confirmed by transcript evidence  | Locus_1319_Transcript_1_1.000_3,Locus_1319_Transcript_2_1.000_3                                 | 100.00% |
| Locus_1358_Transcript_5/6_Confidence_0.357_4 | aldolase                                          | Locus_1358_Transcript_5_0.357_4,Locus_1358_Transcript_6_0.357_2                                 | 100.00% |
| Locus_169_Transcript_1/2_Confidence_1.000_2  | fatty acid and retinol-binding protein 1          | Locus_169_Transcript_1_1.000_2                                                                  | 100.00% |
| Locus_186_Transcript_3/3_Confidence_0.700_1  | ---NA---                                          | Locus_186_Transcript_3_0.700_1                                                                  | 100.00% |
| Locus_3619_Transcript_1/1_Confidence_1.000_1 | zinc metalloproteinase                            | Locus_3619_Transcript_1_1.000_1                                                                 | 100.00% |
| Locus_5886_Transcript_1/1_Confidence_1.000_2 | secreted protein asp-2                            | Locus_5886_Transcript_1_1.000_2                                                                 | 100.00% |
| Locus_153_Transcript_2/3_Confidence_0.833_5  | briggsae cbr-vit-4 protein                        | Locus_153_Transcript_2_0.833_5,Locus_153_Transcript_3_0.833_5                                   | 100.00% |
| Locus_3236_Transcript_1/1_Confidence_1.000_6 | ---NA---                                          | Locus_3236_Transcript_1_1.000_6                                                                 | 99.80%  |
| Locus_347_Transcript_1/1_Confidence_1.000_1  | ---NA---                                          | Locus_347_Transcript_1_1.000_1                                                                  | 100.00% |
| Locus_3624_Transcript_1/1_Confidence_1.000_2 | cytosolic glutathione s-transferase 1             | Locus_3624_Transcript_1_1.000_2                                                                 | 100.00% |
| Locus_5942_Transcript_1/1_Confidence_1.000_2 | ---NA---                                          | Locus_5942_Transcript_1_1.000_2                                                                 | 100.00% |
| Locus_633_Transcript_1/4_Confidence_0.556_2  | briggsae cbr-vit-2 protein                        | Locus_633_Transcript_1_0.556_2,Locus_633_Transcript_2_0.556_2,Locus_633_Transcript_4_0.444_2    | 99.80%  |
| Locus_7308_Transcript_3/3_Confidence_0.400_6 | serine or cysteine protease inhibitor             | Locus_7308_Transcript_3_0.400_6                                                                 | 100.00% |
| Locus_8124_Transcript_1/1_Confidence_1.000_6 | zinc metalloproteinase                            | Locus_8124_Transcript_1_1.000_6                                                                 | 100.00% |
| Locus_8688_Transcript_1/1_Confidence_1.000_4 | venom-allergen-like protein family member (vap-1) | Locus_8688_Transcript_1_1.000_4                                                                 | 100.00% |

|                                               |                                                                          |                                                                                                   |         |
|-----------------------------------------------|--------------------------------------------------------------------------|---------------------------------------------------------------------------------------------------|---------|
| Locus_975_Transcript_1/1_Confidence_1.000_2   | vitellogenin structural genes (yolk protein genes) family member (vit-2) | Locus_975_Transcript_1_1.000_2                                                                    | 99.80%  |
| Locus_1267_Transcript_1/2_Confidence_1.000_2  | isoform cra_a                                                            | Locus_1267_Transcript_1_1.000_2                                                                   | 100.00% |
| Locus_2061_Transcript_1/1_Confidence_1.000_2  | c4b-binding protein alpha chain precursor                                | Locus_2061_Transcript_1_1.000_2                                                                   | 100.00% |
| Locus_2142_Transcript_1/2_Confidence_1.000_6  | ancylostoma-secreted protein 1 precursor                                 | Locus_2142_Transcript_1_1.000_6                                                                   | 100.00% |
| Locus_2405_Transcript_3/4_Confidence_0.600_4  | elegans protein partially confirmed by transcript evidence               | Locus_2405_Transcript_3_0.600_4                                                                   | 99.80%  |
| Locus_4423_Transcript_1/1_Confidence_1.000_3  | ---NA---                                                                 | Locus_4423_Transcript_1_1.000_3                                                                   | 100.00% |
| Locus_7205_Transcript_1/1_Confidence_1.000_5  | ---NA---                                                                 | Locus_7205_Transcript_1_1.000_5                                                                   | 100.00% |
| Locus_800_Transcript_3/4_Confidence_0.375_3   | ---NA---                                                                 | Locus_800_Transcript_3_0.375_3, Locus_800_Transcript_4_0.375_4                                    | 99.90%  |
| Locus_970_Transcript_3/4_Confidence_0.750_3   | thiamine pyrophosphate central domain containing protein                 | Locus_970_Transcript_3_0.750_3                                                                    | 99.80%  |
| Locus_10349_Transcript_1/1_Confidence_1.000_6 | novel protein containing multiple sushi domains (scr repeat)             | Locus_10349_Transcript_1_1.000_6                                                                  | 100.00% |
| Locus_11_Transcript_11/14_Confidence_0.147_5  | vitellogenin structural genes (yolk protein genes) family member (vit-6) | Locus_11_Transcript_11_0.147_5, Locus_11_Transcript_12_0.147_3                                    | 99.80%  |
| Locus_153_Transcript_1/3_Confidence_0.333_5   | ---NA---                                                                 | Locus_153_Transcript_1_0.333_5, Locus_153_Transcript_2_0.833_4, Locus_153_Transcript_3_0.833_4    | 99.80%  |
| Locus_1737_Transcript_1/5_Confidence_0.333_1  | translationally controlled tumor protein                                 | Locus_1737_Transcript_1_0.333_1, Locus_1737_Transcript_3_0.417_2, Locus_1737_Transcript_4_0.500_2 | 100.00% |
| Locus_22057_Transcript_1/1_Confidence_1.000_4 | ---NA---                                                                 | Locus_22057_Transcript_1_1.000_4                                                                  | 100.00% |
| Locus_2417_Transcript_2/2_Confidence_1.000_1  | ---NA---                                                                 | Locus_2417_Transcript_2_1.000_1                                                                   | 100.00% |

|                                              |                                                    |                                                                                                                                 |         |
|----------------------------------------------|----------------------------------------------------|---------------------------------------------------------------------------------------------------------------------------------|---------|
| Locus_2724_Transcript_1/2_Confidence_1.000_3 | hypothetical protein [Angiostrongylus cantonensis] | Locus_2724_Transcript_1_1.000_3,Locus_2724_Transcript_1_1.000_6,Locus_2724_Transcript_2_1.000_3,Locus_2724_Transcript_2_1.000_6 | 100.00% |
| Locus_2728_Transcript_1/2_Confidence_1.000_3 | briggsae cbr-cpi-2 protein                         | Locus_2728_Transcript_1_1.000_3,Locus_2728_Transcript_2_1.000_3                                                                 | 100.00% |
| Locus_3858_Transcript_1/5_Confidence_0.500_3 | serine protease                                    | Locus_3858_Transcript_1_0.500_3,Locus_3858_Transcript_3_0.500_3,Locus_3858_Transcript_5_0.500_3                                 | 100.00% |
| Locus_3914_Transcript_1/1_Confidence_1.000_6 | briggsae cbr-ttr-16 protein                        | Locus_3914_Transcript_1_1.000_6                                                                                                 | 100.00% |
| Locus_3925_Transcript_1/1_Confidence_1.000_2 | ---NA---                                           | Locus_3925_Transcript_1_1.000_2                                                                                                 | 99.80%  |
| Locus_5527_Transcript_1/1_Confidence_1.000_1 | secreted protein asp-2                             | Locus_5527_Transcript_1_1.000_1                                                                                                 | 100.00% |
| Locus_825_Transcript_1/2_Confidence_1.000_6  | calcium activated nucleotidase isoform cra_b       | Locus_825_Transcript_1_1.000_6                                                                                                  | 100.00% |
| Locus_100_Transcript_1/1_Confidence_1.000_6  | globin                                             | Locus_100_Transcript_1_1.000_6                                                                                                  | 100.00% |
| Locus_1081_Transcript_1/2_Confidence_1.000_5 | ---NA---                                           | Locus_1081_Transcript_1_1.000_5                                                                                                 | 99.90%  |
| Locus_1213_Transcript_3/4_Confidence_0.500_1 | elegans protein confirmed by transcript evidence   | Locus_1213_Transcript_3_0.500_1,Locus_1213_Transcript_4_0.500_1                                                                 | 100.00% |
| Locus_1216_Transcript_1/1_Confidence_1.000_4 | placental protein 11 related                       | Locus_1216_Transcript_1_1.000_4                                                                                                 | 100.00% |
| Locus_1500_Transcript_1/1_Confidence_1.000_2 | actin                                              | Locus_1500_Transcript_1_1.000_2,Locus_314_Transcript_2_0.625_6,Locus_314_Transcript_3_0.625_6                                   | 100.00% |
| Locus_1908_Transcript_1/2_Confidence_1.000_1 | cysteine proteinase                                | Locus_1908_Transcript_1_1.000_1                                                                                                 | 100.00% |
| Locus_2287_Transcript_1/4_Confidence_0.625_3 | elegans protein confirmed by transcript evidence   | Locus_2287_Transcript_1_0.625_3,Locus_2287_Transcript_2_0.625_1,Locus_2287_Transcript_4_0.625_3                                 | 100.00% |
| Locus_2684_Transcript_2/2_Confidence_1.000_1 | ---NA---                                           | Locus_2684_Transcript_2_1.000_1                                                                                                 | 100.00% |
| Locus_3465_Transcript_2/3_Confidence_0.812_4 | ---NA---                                           | Locus_3465_Transcript_2_0.812_4                                                                                                 | 100.00% |
| Locus_4068_Transcript_1/1_Confidence_1.000_3 | ---NA---                                           | Locus_4068_Transcript_1_1.000_3                                                                                                 | 100.00% |

|                                               |                                                                          |                                                                                                                                                                                                |         |
|-----------------------------------------------|--------------------------------------------------------------------------|------------------------------------------------------------------------------------------------------------------------------------------------------------------------------------------------|---------|
| Locus_412_Transcript_1/6_Confidence_0.625_3   | peroxiredoxin 1 variant 2                                                | Locus_412_Transcript_1_0.625_3, Locus_412_Transcript_1_0.625_4, Locus_412_Transcript_2_0.625_3, Locus_412_Transcript_2_0.625_4, Locus_412_Transcript_5_0.375_5, Locus_412_Transcript_6_0.375_3 | 100.00% |
| Locus_5744_Transcript_4/4_Confidence_0.625_3  | ---NA---                                                                 | Locus_5744_Transcript_4_0.625_3                                                                                                                                                                | 100.00% |
| Locus_73_Transcript_4/5_Confidence_0.095_3    | globin                                                                   | Locus_73_Transcript_4_0.095_3                                                                                                                                                                  | 100.00% |
| Locus_785_Transcript_1/7_Confidence_0.444_3   | ---NA---                                                                 | Locus_785_Transcript_1_0.444_3, Locus_785_Transcript_3_0.389_3, Locus_785_Transcript_6_0.500_3, Locus_785_Transcript_7_0.556_3                                                                 | 100.00% |
| Locus_844_Transcript_1/1_Confidence_1.000_6   | ---NA---                                                                 | Locus_844_Transcript_1_1.000_6                                                                                                                                                                 | 99.80%  |
| Locus_9150_Transcript_1/1_Confidence_1.000_5  | hypothetical protein K02F3.9 [Caenorhabditis elegans]                    | Locus_9150_Transcript_1_1.000_5                                                                                                                                                                | 99.80%  |
| Locus_949_Transcript_1/1_Confidence_1.000_6   | venom allergen antigen-like protein 1                                    | Locus_949_Transcript_1_1.000_6                                                                                                                                                                 | 100.00% |
| Locus_11_Transcript_10/14_Confidence_0.176_2  | vitellogenin structural genes (yolk protein genes) family member (vit-6) | Locus_11_Transcript_10_0.176_2, Locus_11_Transcript_13_0.176_2                                                                                                                                 | 99.80%  |
| Locus_1311_Transcript_1/1_Confidence_1.000_6  | secreted protein 5 precursor                                             | Locus_1311_Transcript_1_1.000_6                                                                                                                                                                | 99.80%  |
| Locus_1600_Transcript_1/1_Confidence_1.000_4  | paz piwi domain-containing family member (ppw-1)                         | Locus_1600_Transcript_1_1.000_4                                                                                                                                                                | 100.00% |
| Locus_16128_Transcript_1/2_Confidence_1.000_2 | calcium activated nucleotidase isoform cra_b                             | Locus_16128_Transcript_1_1.000_2, Locus_16128_Transcript_2_1.000_2                                                                                                                             | 100.00% |
| Locus_1798_Transcript_1/3_Confidence_0.750_4  | c-type lectin family member (clcc-266)                                   | Locus_1798_Transcript_1_0.750_4, Locus_1798_Transcript_2_0.750_4, Locus_1798_Transcript_3_0.750_4                                                                                              | 100.00% |
| Locus_2189_Transcript_1/2_Confidence_1.000_3  | aspartyl protease inhibitor 1                                            | Locus_2189_Transcript_1_1.000_3, Locus_2189_Transcript_2_1.000_3                                                                                                                               | 100.00% |

|                                               |                                                            |                                                                                                                                 |         |
|-----------------------------------------------|------------------------------------------------------------|---------------------------------------------------------------------------------------------------------------------------------|---------|
| Locus_2287_Transcript_3/4_Confidence_0.375_3  | elegans protein confirmed by transcript evidence           | Locus_2287_Transcript_3_0.375_3                                                                                                 | 99.80%  |
| Locus_2365_Transcript_1/1_Confidence_1.000_1  | metalloprotease 1 precursor                                | Locus_2365_Transcript_1_1.000_1                                                                                                 | 100.00% |
| Locus_2423_Transcript_1/2_Confidence_1.000_2  | malate cytoplasmic                                         | Locus_2423_Transcript_1_1.000_2,Locus_2423_Transcript_2_1.000_2                                                                 | 100.00% |
| Locus_3123_Transcript_1/2_Confidence_1.000_2  | elegans protein confirmed by transcript evidence           | Locus_3123_Transcript_1_1.000_2,Locus_3123_Transcript_1_1.000_5,Locus_3123_Transcript_2_1.000_2,Locus_3123_Transcript_2_1.000_5 | 100.00% |
| Locus_38_Transcript_1/1_Confidence_1.000_2    | elegans protein partially confirmed by transcript evidence | Locus_38_Transcript_1_1.000_2                                                                                                   | 100.00% |
| Locus_5855_Transcript_1/1_Confidence_1.000_2  | elegans protein partially confirmed by transcript evidence | Locus_5855_Transcript_1_1.000_2                                                                                                 | 99.80%  |
| Locus_6538_Transcript_1/1_Confidence_1.000_1  | elegans protein confirmed by transcript evidence           | Locus_6538_Transcript_1_1.000_1                                                                                                 | 99.80%  |
| Locus_6601_Transcript_1/1_Confidence_1.000_5  | calcium activated nucleotidase isoform cra_b               | Locus_6601_Transcript_1_1.000_5                                                                                                 | 100.00% |
| Locus_7004_Transcript_1/1_Confidence_1.000_1  | elegans protein confirmed by transcript evidence           | Locus_7004_Transcript_1_1.000_1                                                                                                 | 99.80%  |
| Locus_7986_Transcript_2/2_Confidence_1.000_5  | ---NA---                                                   | Locus_7986_Transcript_2_1.000_5                                                                                                 | 100.00% |
| Locus_8223_Transcript_1/1_Confidence_1.000_4  | ---NA---                                                   | Locus_8223_Transcript_1_1.000_4                                                                                                 | 100.00% |
| Locus_8678_Transcript_1/1_Confidence_1.000_1  | triosephosphate isomerase                                  | Locus_8678_Transcript_1_1.000_1                                                                                                 | 100.00% |
| Locus_1079_Transcript_1/1_Confidence_1.000_3  | ppib protein                                               | Locus_1079_Transcript_1_1.000_3                                                                                                 | 100.00% |
| Locus_11813_Transcript_1/1_Confidence_1.000_4 | ll20 15kda ladder antigen                                  | Locus_11813_Transcript_1_1.000_4                                                                                                | 99.80%  |



|                                               |                                                            |                                                                                                                                                                 |         |
|-----------------------------------------------|------------------------------------------------------------|-----------------------------------------------------------------------------------------------------------------------------------------------------------------|---------|
| Locus_12666_Transcript_1/1_Confidence_1.000_2 | ---NA---                                                   | Locus_12666_Transcript_1_1.000_2                                                                                                                                | 100.00% |
| Locus_13497_Transcript_1/1_Confidence_1.000_3 | ---NA---                                                   | Locus_13497_Transcript_1_1.000_3                                                                                                                                | 99.80%  |
| Locus_16079_Transcript_1/1_Confidence_1.000_1 | elegans protein partially confirmed by transcript evidence | Locus_16079_Transcript_1_1.000_1                                                                                                                                | 99.90%  |
| Locus_2530_Transcript_1/7_Confidence_0.409_4  | metalloprotease 1 precursor                                | Locus_2530_Transcript_1_0.409_4,Locus_2530_Transcript_3_0.409_4,Locus_2530_Transcript_4_0.364_4,Locus_2530_Transcript_5_0.545_4,Locus_2530_Transcript_7_0.409_4 | 100.00% |
| Locus_3111_Transcript_1/2_Confidence_1.000_4  | phosphatidylethanolamine-binding protein                   | Locus_3111_Transcript_1_1.000_4,Locus_3111_Transcript_2_1.000_4                                                                                                 | 100.00% |
| Locus_3209_Transcript_2/6_Confidence_0.438_6  | elegans protein partially confirmed by transcript evidence | Locus_3209_Transcript_2_0.438_6                                                                                                                                 | 99.80%  |
| Locus_3370_Transcript_1/1_Confidence_1.000_4  | ribonucleotide reductase m2 polypeptide                    | Locus_3370_Transcript_1_1.000_4                                                                                                                                 | 100.00% |
| Locus_3502_Transcript_1/2_Confidence_1.000_5  | ---NA---                                                   | Locus_3502_Transcript_1_1.000_5,Locus_3502_Transcript_2_1.000_2                                                                                                 | 99.80%  |
| Locus_361_Transcript_1/1_Confidence_1.000_3   | elegans protein partially confirmed by transcript evidence | Locus_361_Transcript_1_1.000_3                                                                                                                                  | 100.00% |
| Locus_3626_Transcript_5/5_Confidence_0.600_3  | novel protein hatching enzymes                             | Locus_3626_Transcript_5_0.600_3                                                                                                                                 | 100.00% |

|                                               |                                                  |                                                                                                |         |
|-----------------------------------------------|--------------------------------------------------|------------------------------------------------------------------------------------------------|---------|
| Locus_404_Transcript_5/6_Confidence_0.250_4   | elegans protein confirmed by transcript evidence | Locus_404_Transcript_5_0.250_4, Locus_404_Transcript_6_0.250_3                                 | 99.80%  |
| Locus_4720_Transcript_1/1_Confidence_1.000_1  | ---NA---                                         | Locus_4720_Transcript_1_1.000_1                                                                | 100.00% |
| Locus_4863_Transcript_1/1_Confidence_1.000_2  | elegans protein confirmed by transcript evidence | Locus_4863_Transcript_1_1.000_2                                                                | 100.00% |
| Locus_541_Transcript_1/4_Confidence_0.692_5   | enolase                                          | Locus_541_Transcript_1_0.692_5, Locus_541_Transcript_3_0.692_5, Locus_541_Transcript_4_0.692_5 | 100.00% |
| Locus_624_Transcript_3/3_Confidence_0.625_2   | tissue factor pathway inhibitor                  | Locus_624_Transcript_3_0.625_2                                                                 | 100.00% |
| Locus_6250_Transcript_1/1_Confidence_1.000_3  | lysozyme                                         | Locus_6250_Transcript_1_1.000_3                                                                | 100.00% |
| Locus_6760_Transcript_1/1_Confidence_1.000_1  | ---NA---                                         | Locus_6760_Transcript_1_1.000_1                                                                | 100.00% |
| Locus_7281_Transcript_1/1_Confidence_1.000_3  | secreted protein asp-2                           | Locus_7281_Transcript_1_1.000_3                                                                | 100.00% |
| Locus_8509_Transcript_1/1_Confidence_1.000_2  | zinc metallopeptidase                            | Locus_8509_Transcript_1_1.000_2                                                                | 100.00% |
| Locus_9113_Transcript_1/1_Confidence_1.000_1  | elegans protein confirmed by transcript evidence | Locus_9113_Transcript_1_1.000_1                                                                | 100.00% |
| Locus_106_Transcript_1/1_Confidence_1.000_3   | protein disulfide isomerase                      | Locus_106_Transcript_1_1.000_3                                                                 | 100.00% |
| Locus_10663_Transcript_1/1_Confidence_1.000_2 | tissue factor pathway inhibitor 2-like           | Locus_10663_Transcript_1_1.000_2                                                               | 99.80%  |

|                                               |                                                               |                                                                                                                                                                                                                                                                 |         |
|-----------------------------------------------|---------------------------------------------------------------|-----------------------------------------------------------------------------------------------------------------------------------------------------------------------------------------------------------------------------------------------------------------|---------|
| Locus_1117_Transcript_1/6_Confidence_0.250_2  | ---NA---                                                      | Locus_1117_Transcript_1_0.250_2,Locus_1117_Transcript_3_0.708_2,Locus_1117_Transcript_3_0.708_5,Locus_1117_Transcript_4_0.542_2,Locus_1117_Transcript_5_0.667_2,Locus_1117_Transcript_5_0.667_5,Locus_1117_Transcript_6_0.667_2,Locus_1117_Transcript_6_0.667_5 | 100.00% |
| Locus_11537_Transcript_1/1_Confidence_1.000_4 | l3 es protein                                                 | Locus_11537_Transcript_1_1.000_4                                                                                                                                                                                                                                | 100.00% |
| Locus_123_Transcript_7/8_Confidence_0.400_6   | heat shock protein 70                                         | Locus_123_Transcript_7_0.400_6,Locus_123_Transcript_8_0.400_2                                                                                                                                                                                                   | 99.80%  |
| Locus_1247_Transcript_1/2_Confidence_1.000_4  | major sperm protein                                           | Locus_1247_Transcript_1_1.000_4,Locus_1247_Transcript_2_1.000_4                                                                                                                                                                                                 | 99.80%  |
| Locus_12822_Transcript_1/1_Confidence_1.000_3 | peptidase s9 prolyl oligopeptidase active site domain protein | Locus_12822_Transcript_1_1.000_3                                                                                                                                                                                                                                | 100.00% |
| Locus_13707_Transcript_1/1_Confidence_1.000_3 | ---NA---                                                      | Locus_13707_Transcript_1_1.000_3                                                                                                                                                                                                                                | 99.80%  |
| Locus_1814_Transcript_1/1_Confidence_1.000_6  | nucleoside diphosphate kinase b                               | Locus_1814_Transcript_1_1.000_6                                                                                                                                                                                                                                 | 99.80%  |
| Locus_18853_Transcript_1/1_Confidence_1.000_5 | ---NA---                                                      | Locus_18853_Transcript_1_1.000_5                                                                                                                                                                                                                                | 99.80%  |
| Locus_20948_Transcript_1/1_Confidence_1.000_2 | briggsae cbr-far-8 protein                                    | Locus_20948_Transcript_1_1.000_2                                                                                                                                                                                                                                | 100.00% |
| Locus_23434_Transcript_1/1_Confidence_1.000_4 | ladder protein                                                | Locus_23434_Transcript_1_1.000_4                                                                                                                                                                                                                                | 99.80%  |
| Locus_24_Transcript_1/1_Confidence_1.000_3    | ---NA---                                                      | Locus_24_Transcript_1_1.000_3                                                                                                                                                                                                                                   | 99.80%  |
| Locus_2902_Transcript_2/3_Confidence_0.667_5  | secreted protein asp-2                                        | Locus_2902_Transcript_2_0.667_5                                                                                                                                                                                                                                 | 100.00% |

|                                              |                                                                                                                                                   |                                                                 |         |
|----------------------------------------------|---------------------------------------------------------------------------------------------------------------------------------------------------|-----------------------------------------------------------------|---------|
| Locus_3209_Transcript_3/6_Confidence_0.375_5 | elegans protein partially confirmed by transcript evidence                                                                                        | Locus_3209_Transcript_3_0.375_5,Locus_3209_Transcript_4_0.375_6 | 99.80%  |
| Locus_3220_Transcript_1/2_Confidence_1.000_4 | ferritin                                                                                                                                          | Locus_3220_Transcript_1_1.000_4,Locus_3220_Transcript_2_1.000_4 | 100.00% |
| Locus_4325_Transcript_1/1_Confidence_1.000_2 | mannose c type 1                                                                                                                                  | Locus_4325_Transcript_1_1.000_2                                 | 100.00% |
| Locus_4404_Transcript_1/1_Confidence_1.000_3 | zinc metalloproteinase                                                                                                                            | Locus_4404_Transcript_1_1.000_3                                 | 100.00% |
| Locus_5289_Transcript_2/3_Confidence_0.667_2 | anis1_anis1_ame: full=major allergen anis1_ame: full=21kda allergen_ame: full=excretory gland allergen anis1_ame: allergen=anis1 flags: precursor | Locus_5289_Transcript_2_0.667_2                                 | 100.00% |
| Locus_55_Transcript_1/2_Confidence_0.889_2   | briggsae cbr-cpg-4 protein                                                                                                                        | Locus_55_Transcript_1_0.889_2,Locus_55_Transcript_2_0.889_2     | 99.80%  |
| Locus_5598_Transcript_1/1_Confidence_1.000_6 | elegans protein confirmed by transcript evidence                                                                                                  | Locus_5598_Transcript_1_1.000_6                                 | 99.80%  |
| Locus_6242_Transcript_1/1_Confidence_1.000_6 | briggsae cbr-gst- protein                                                                                                                         | Locus_6242_Transcript_1_1.000_6                                 | 100.00% |
| Locus_7093_Transcript_1/1_Confidence_1.000_2 | ---NA---                                                                                                                                          | Locus_7093_Transcript_1_1.000_2                                 | 99.80%  |
| Locus_7740_Transcript_1/1_Confidence_1.000_4 | metalloproteinase 1 precursor                                                                                                                     | Locus_7740_Transcript_1_1.000_4                                 | 100.00% |

|                                               |                                                  |                                                                                                                               |         |
|-----------------------------------------------|--------------------------------------------------|-------------------------------------------------------------------------------------------------------------------------------|---------|
| Locus_8012_Transcript_1/1_Confidence_1.000_4  | fatty acid binding protein 4                     | Locus_8012_Transcript_1_1.000_4                                                                                               | 100.00% |
| Locus_85_Transcript_3/3_Confidence_0.714_2    | elegans protein confirmed by transcript evidence | Locus_85_Transcript_3_0.714_2                                                                                                 | 99.80%  |
| Locus_9275_Transcript_1/1_Confidence_1.000_6  | heat-responsive protein 12                       | Locus_9275_Transcript_1_1.000_6                                                                                               | 99.80%  |
| Locus_97_Transcript_14/17_Confidence_0.321_5  | secreted protein 5 precursor                     | Locus_97_Transcript_14_0.321_5, Locus_97_Transcript_15_0.377_5, Locus_97_Transcript_17_0.321_5, Locus_97_Transcript_8_0.264_4 | 99.80%  |
| Locus_9926_Transcript_1/2_Confidence_1.000_1  | adenosine deaminase                              | Locus_9926_Transcript_1_1.000_1, Locus_9926_Transcript_2_1.000_1                                                              | 99.80%  |
| Locus_999_Transcript_3/3_Confidence_0.400_2   | profilin iii                                     | Locus_999_Transcript_3_0.400_2                                                                                                | 100.00% |
| Locus_1034_Transcript_1/1_Confidence_1.000_2  | aspartyl protease family member (asp-2)          | Locus_1034_Transcript_1_1.000_2                                                                                               | 99.80%  |
| Locus_11179_Transcript_2/3_Confidence_0.600_2 | elegans protein confirmed by transcript evidence | Locus_11179_Transcript_2_0.600_2, Locus_11179_Transcript_3_0.600_2                                                            | 99.80%  |
| Locus_1253_Transcript_1/2_Confidence_1.000_4  | ---NA---                                         | Locus_1253_Transcript_1_1.000_4, Locus_1253_Transcript_2_1.000_4                                                              | 99.80%  |
| Locus_1302_Transcript_1/2_Confidence_1.000_3  | ---NA---                                         | Locus_1302_Transcript_1_1.000_3                                                                                               | 99.80%  |
| Locus_13077_Transcript_1/1_Confidence_1.000_4 | glutathione s-transferase                        | Locus_13077_Transcript_1_1.000_4                                                                                              | 99.80%  |
| Locus_1316_Transcript_1/1_Confidence_1.000_3  | protein disulfide isomerase                      | Locus_1316_Transcript_1_1.000_3                                                                                               | 99.80%  |

|                                               |                                                            |                                                                                                      |        |
|-----------------------------------------------|------------------------------------------------------------|------------------------------------------------------------------------------------------------------|--------|
| Locus_14802_Transcript_1/2_Confidence_1.000_2 | aminopeptidase n                                           | Locus_14802_Transcript_1_1.000_2,<br>Locus_14802_Transcript_2_1.000_3                                | 99.80% |
| Locus_15246_Transcript_1/1_Confidence_1.000_5 | secreted protein asp-2                                     | Locus_15246_Transcript_1_1.000_5                                                                     | 99.80% |
| Locus_15549_Transcript_1/1_Confidence_1.000_5 | acylamino-acid-releasing enzyme                            | Locus_15549_Transcript_1_1.000_5                                                                     | 99.90% |
| Locus_158_Transcript_1/3_Confidence_0.727_2   | briggsae cbr-cpg-2 protein                                 | Locus_158_Transcript_1_0.727_2,Lo<br>cus_158_Transcript_2_0.636_1,Locu<br>s_158_Transcript_3_0.818_1 | 99.80% |
| Locus_2192_Transcript_1/1_Confidence_1.000_5  | profilin                                                   | Locus_2192_Transcript_1_1.000_5                                                                      | 99.80% |
| Locus_220_Transcript_1/2_Confidence_1.000_4   | legumain                                                   | Locus_220_Transcript_1_1.000_4,Lo<br>cus_220_Transcript_2_1.000_4                                    | 99.80% |
| Locus_2510_Transcript_1/1_Confidence_1.000_5  | elegans protein partially confirmed by transcript evidence | Locus_2510_Transcript_1_1.000_5                                                                      | 99.80% |
| Locus_2529_Transcript_1/1_Confidence_1.000_1  | aspartyl protease family member (asp-2)                    | Locus_2529_Transcript_1_1.000_1                                                                      | 99.80% |
| Locus_2535_Transcript_1/1_Confidence_1.000_4  | elegans protein partially confirmed by transcript evidence | Locus_2535_Transcript_1_1.000_4                                                                      | 99.80% |
| Locus_2709_Transcript_1/1_Confidence_1.000_3  | secreted protein 5 precursor                               | Locus_2709_Transcript_1_1.000_3                                                                      | 99.80% |
| Locus_2717_Transcript_1/1_Confidence_1.000_3  | ---NA---                                                   | Locus_2717_Transcript_1_1.000_3                                                                      | 99.80% |
| Locus_2756_Transcript_1/1_Confidence_1.000_5  | immunogenic protein 3                                      | Locus_2756_Transcript_1_1.000_5                                                                      | 99.80% |
| Locus_2825_Transcript_1/1_Confidence_1.000_6  | elegans protein confirmed by transcript evidence           | Locus_2825_Transcript_1_1.000_6                                                                      | 99.80% |
| Locus_3574_Transcript_1/1_Confidence_1.000_4  | ---NA---                                                   | Locus_3574_Transcript_1_1.000_4                                                                      | 99.80% |
| Locus_3751_Transcript_1/1_Confidence_1.000_2  | sxc2 protein                                               | Locus_3751_Transcript_1_1.000_2                                                                      | 99.80% |

|                                              |                                                       |                                                                |        |
|----------------------------------------------|-------------------------------------------------------|----------------------------------------------------------------|--------|
| Locus_3946_Transcript_1/1_Confidence_1.000_6 | briggsae cbr-fum-1 protein                            | Locus_3946_Transcript_1_1.000_6                                | 99.80% |
| Locus_3970_Transcript_1/1_Confidence_1.000_2 | macrophage migration inhibitory factor                | Locus_3970_Transcript_1_1.000_2                                | 99.80% |
| Locus_4193_Transcript_1/1_Confidence_1.000_2 | glutamate dehydrogenase                               | Locus_4193_Transcript_1_1.000_2                                | 99.80% |
| Locus_421_Transcript_1/2_Confidence_1.000_5  | elegans protein confirmed by transcript evidence      | Locus_421_Transcript_1_1.000_5, Locus_421_Transcript_2_1.000_5 | 99.80% |
| Locus_4977_Transcript_1/1_Confidence_1.000_4 | elegans protein confirmed by transcript evidence      | Locus_4977_Transcript_1_1.000_4                                | 99.80% |
| Locus_53_Transcript_1/1_Confidence_1.000_6   | c-type lectin-1                                       | Locus_53_Transcript_1_1.000_6                                  | 99.80% |
| Locus_606_Transcript_1/1_Confidence_1.000_3  | hypothetical protein F48E3.4 [Caenorhabditis elegans] | Locus_606_Transcript_1_1.000_3                                 | 99.80% |
| Locus_6800_Transcript_1/1_Confidence_1.000_1 | glutathione s-transferase                             | Locus_6800_Transcript_1_1.000_1                                | 99.80% |

|                                                     |                                                        |                                                                                                |         |
|-----------------------------------------------------|--------------------------------------------------------|------------------------------------------------------------------------------------------------|---------|
| <b>Locus_731_Transcript_1/3_Confidence_0.667_4</b>  | fumarate hydratase                                     | Locus_731_Transcript_1_0.667_4, Locus_731_Transcript_2_0.667_4, Locus_731_Transcript_3_0.667_4 | 99.80%  |
| <b>Locus_8097_Transcript_2/3_Confidence_0.750_1</b> | metalloprotease 1 precursor                            | Locus_8097_Transcript_2_0.750_1                                                                | 99.80%  |
| <b>Locus_883_Transcript_1/2_Confidence_1.000_4</b>  | hypothetical protein F42A10.7 [Caenorhabditis elegans] | Locus_883_Transcript_1_1.000_4, Locus_883_Transcript_2_1.000_4                                 | 99.80%  |
| <b>Locus_902_Transcript_1/1_Confidence_1.000_4</b>  | metalloprotease 1 precursor                            | Locus_902_Transcript_1_1.000_4                                                                 | 99.80%  |
| <b>Locus_9573_Transcript_2/3_Confidence_0.333_6</b> | suppression of tumorigenicity 14 (colon carcinoma)     | Locus_9573_Transcript_2_0.333_6                                                                | 100.00% |



| Number of total spectra | Number of unique peptides | Percentage of total spectra | Percentage sequence coverage | Blastx Closest Hit description                                           | Specie                         |
|-------------------------|---------------------------|-----------------------------|------------------------------|--------------------------------------------------------------------------|--------------------------------|
| 132                     | 19                        | 3.96%                       | 56.70%                       | two-domain activation associated secreted protein ASP4 precursor         | Ostertagia ostertagi           |
| 82                      | 5                         | 2.46%                       | 34.60%                       | Globin-like host-protective antigen                                      | Trichostrongylus colubriformis |
| 74                      | 6                         | 2.22%                       | 46.40%                       | secreted protein 4 precursor                                             | Ancylostoma caninum            |
| 73                      | 10                        | 2.19%                       | 45.80%                       | Globin-like host-protective antigen                                      | Trichostrongylus colubriformis |
| 53                      | 11                        | 1.59%                       | 52.00%                       | secreted protein 6 precursor                                             | Ancylostoma caninum            |
| 47                      | 7                         | 1.41%                       | 45.20%                       | Globin-like host-protective antigen                                      | Trichostrongylus colubriformis |
| 46                      | 10                        | 1.38%                       | 50.90%                       | C. briggsae CBR-VIT-6 protein                                            | Caenorhabditis briggsae        |
| 46                      | 8                         | 1.38%                       | 45.10%                       | LYSozyme family member (lys-8)                                           | Caenorhabditis elegans         |
| 45                      | 10                        | 1.35%                       | 50.80%                       | VITellogenin structural genes (yolk protein genes) family member (vit-1) | Caenorhabditis elegans         |
| 44                      | 17                        | 1.32%                       | 40.90%                       | DVA-1 polyprotein                                                        | Dictyocaulus viviparus         |
| 43                      | 10                        | 1.29%                       | 47.80%                       | VITellogenin structural genes (yolk protein genes) family member (vit-2) | Caenorhabditis elegans         |
| 41                      | 7                         | 1.23%                       | 36.30%                       | VITellogenin structural genes (yolk protein genes) family member (vit-4) | Caenorhabditis elegans         |
| 35                      | 4                         | 1.05%                       | 31.10%                       | C. briggsae CBR-VIT-2 protein                                            | Caenorhabditis briggsae        |
| 30                      | 7                         | 0.90%                       | 40.20%                       | Vitellogenin-6                                                           | Oscheius sp. (strain CEW1)     |

|    |    |       |        |                                                                  |                                |
|----|----|-------|--------|------------------------------------------------------------------|--------------------------------|
| 28 | 7  | 0.84% | 51.30% | Vitellogenin-6                                                   | Oscheius sp. (strain CEW1)     |
| 27 | 7  | 0.81% | 41.00% | Globin-like host-protective antigen                              | Trichostrongylus colubriformis |
| 27 | 2  | 0.81% | 46.80% | ancylostoma-secreted protein 1 precursor                         | Ancylostoma duodenale          |
| 25 | 2  | 0.75% | 23.20% |                                                                  |                                |
| 23 | 7  | 0.69% | 44.70% | secreted protein 5 precursor                                     | Ancylostoma caninum            |
| 23 | 3  | 0.69% | 28.40% | Vitellogenin-6                                                   | Oscheius sp. (strain CEW1)     |
| 23 | 14 | 0.69% | 42.80% | putative neuromuscular acetylcholinesterase                      | Dictyocaulus viviparus         |
| 21 | 8  | 0.63% | 37.50% | secreted protein 4 precursor                                     | Ancylostoma caninum            |
| 21 | 11 | 0.63% | 36.70% | AF132291_1ancylostoma-secreted protein 1 precursor               | Ancylostoma caninum            |
| 19 | 3  | 0.57% | 44.50% | Myoglobin                                                        | Nippostrongylus brasiliensis   |
| 19 | 3  | 0.57% | 27.10% | C. briggsae CBR-RPL-6 protein                                    | Caenorhabditis briggsae        |
| 18 | 3  | 0.54% | 34.70% | C. briggsae CBR-VIT-6 protein                                    | Caenorhabditis briggsae        |
| 17 | 12 | 0.51% | 48.10% | calcium-activated apyrase                                        | Teladorsagia circumcincta      |
| 16 | 5  | 0.48% | 42.10% | AF305957_1vitellogenin                                           | Haemonchus contortus           |
| 15 | 6  | 0.45% | 50.90% | two-domain activation associated secreted protein ASP4 precursor | Ostertagia ostertagi           |

|    |    |       |        |                                                                          |                             |
|----|----|-------|--------|--------------------------------------------------------------------------|-----------------------------|
| 15 | 12 | 0.45% | 37.70% | enolase                                                                  | Haemonchus contortus        |
| 14 | 4  | 0.42% | 27.70% | secreted protein 4 precursor                                             | Ancylostoma caninum         |
| 14 | 2  | 0.42% | 23.60% |                                                                          |                             |
| 14 | 5  | 0.42% | 73.50% |                                                                          |                             |
| 14 | 5  | 0.42% | 22.90% | secreted-protein 1 precursor                                             | Ancylostoma ceylanicum      |
| 13 | 8  | 0.39% | 17.80% | DVA-1 polyprotein                                                        | Dictyocaulus viviparus      |
| 13 | 5  | 0.39% | 28.60% | C. briggsae CBR-TTR-19 protein                                           | Caenorhabditis briggsae     |
| 13 | 2  | 0.39% | 18.50% | secreted protein 5 precursor                                             | Ancylostoma ceylanicum      |
| 13 | 8  | 0.39% | 53.70% | C. briggsae CBR-TTR-15 protein                                           | Caenorhabditis briggsae     |
| 12 | 2  | 0.36% | 26.30% | VITellogenin structural genes (yolk protein genes) family member (vit-2) | Caenorhabditis elegans      |
| 12 | 4  | 0.36% | 35.80% |                                                                          |                             |
| 12 | 10 | 0.36% | 40.00% | C. briggsae CBR-NEX-1 protein                                            | Caenorhabditis briggsae     |
| 12 | 3  | 0.36% | 26.40% | C. briggsae CBR-VIT-6 protein                                            | Caenorhabditis briggsae     |
| 12 | 5  | 0.36% | 15.30% | Ancylostoma secreted protein                                             | Ancylostoma caninum         |
| 12 | 3  | 0.36% | 20.60% | parasitic stage specific protein 2                                       | Haemonchus contortus        |
| 12 | 2  | 0.36% | 34.60% | C. briggsae CBR-VIT-6 protein                                            | Caenorhabditis briggsae     |
| 12 | 6  | 0.36% | 40.60% | AF273705_1zinc metallopeptidase 2 MEP2                                   | Ancylostoma caninum         |
| 11 | 2  | 0.33% | 70.60% |                                                                          | Ancylostoma caninum         |
| 11 | 2  | 0.33% | 27.50% | Vitellogenin-6                                                           | Oscheius sp. (strain CEW1)  |
| 11 | 7  | 0.33% | 25.30% | putative Lipid Binding Protein                                           | Angiostrongylus cantonensis |

|    |    |       |        |                                                                         |                           |
|----|----|-------|--------|-------------------------------------------------------------------------|---------------------------|
| 11 | 10 | 0.33% | 20.70% | neuronal acetylcholinesterase precursor                                 | Dictyocaulus viviparus    |
| 11 | 7  | 0.33% | 22.80% | 14-3-3 protein isoform 2                                                | Ancylostoma caninum       |
| 10 | 9  | 0.30% | 26.30% | C. briggsae CBR-LEC-5 protein                                           | Caenorhabditis briggsae   |
| 10 | 8  | 0.30% | 33.90% | hypothetical protein F01F1.12                                           | Caenorhabditis elegans    |
| 10 | 7  | 0.30% | 26.60% | putative ES protein F7                                                  | Ostertagia ostertagi      |
| 10 | 5  | 0.30% | 23.80% |                                                                         |                           |
| 10 | 5  | 0.30% | 18.40% | putative zinc metallopeptidase                                          | Haemonchus contortus      |
| 10 | 5  | 0.30% | 76.10% | secreted protein 6 precursor                                            | Ancylostoma caninum       |
| 9  | 4  | 0.27% | 30.80% | VTellogenin structural genes (yolk protein genes) family member (vit-4) | Caenorhabditis elegans    |
| 9  | 2  | 0.27% | 47.80% |                                                                         |                           |
| 9  | 4  | 0.27% | 32.50% |                                                                         |                           |
| 9  | 8  | 0.27% | 55.80% | Glutathione Transferase-2                                               | Heligmosomoides polygyrus |
| 9  | 4  | 0.27% | 43.70% |                                                                         |                           |
| 9  | 2  | 0.27% | 20.20% | AF305957_1vitellogenin                                                  | Haemonchus contortus      |
| 9  | 8  | 0.27% | 30.40% | Hypothetical protein CBG06352                                           | Caenorhabditis briggsae   |
| 9  | 8  | 0.27% | 19.70% | putative zinc metallopeptidase                                          | Haemonchus contortus      |
| 9  | 4  | 0.27% | 26.80% | secreted protein 6 precursor                                            | Ancylostoma caninum       |

|   |   |       |        |                                                                          |                         |
|---|---|-------|--------|--------------------------------------------------------------------------|-------------------------|
| 9 | 2 | 0.27% | 40.80% | put. vitellogenin                                                        | Caenorhabditis elegans  |
| 8 | 7 | 0.24% | 14.00% | C. briggsae CBR-HSP-60 protein                                           | Caenorhabditis briggsae |
| 8 | 5 | 0.24% | 28.00% | C4b-binding protein alpha chain precursor                                | Gallus gallus           |
| 8 | 6 | 0.24% | 16.20% | ancylostoma-secreted protein 1 precursor                                 | Ancylostoma duodenale   |
| 8 | 2 | 0.24% | 54.70% | secreted protein 6 precursor                                             | Ancylostoma caninum     |
| 8 | 6 | 0.24% | 31.70% |                                                                          |                         |
| 8 | 5 | 0.24% | 34.10% |                                                                          |                         |
| 8 | 2 | 0.24% | 48.00% |                                                                          |                         |
| 8 | 2 | 0.24% | 20.60% | Hypothetical protein CBG03380                                            | Caenorhabditis briggsae |
| 7 | 4 | 0.21% | 13.70% | novel protein containing multiple sushi domains (SCR repeat)             | Danio rerio             |
| 7 | 2 | 0.21% | 38.00% | VITellogenin structural genes (yolk protein genes) family member (vit-6) | Caenorhabditis elegans  |
| 7 | 2 | 0.21% | 16.70% |                                                                          |                         |
| 7 | 5 | 0.21% | 21.00% | translationally controlled tumor protein                                 | Ostertagia ostertagi    |
| 7 | 5 | 0.21% | 34.10% |                                                                          |                         |
| 7 | 5 | 0.21% | 17.30% |                                                                          |                         |

|   |   |       |        |                                                            |                              |
|---|---|-------|--------|------------------------------------------------------------|------------------------------|
| 7 | 4 | 0.21% | 10.30% | hypothetical protein                                       | Angiostrongylus cantonensis  |
| 7 | 4 | 0.21% | 26.50% | nippocystatin                                              | Nippostrongylus brasiliensis |
| 7 | 4 | 0.21% | 17.50% | GJ10405                                                    | Drosophila virilis           |
| 7 | 5 | 0.21% | 45.10% | hypothetical protein LOAG_12508                            | Loa loa                      |
| 7 | 2 | 0.21% | 35.00% |                                                            |                              |
| 7 | 6 | 0.21% | 18.60% | secreted-protein 1 precursor                               | Ancylostoma ceylanicum       |
| 7 | 7 | 0.21% | 38.90% | calcium-activated apyrase                                  | Teladorsagia circumcincta    |
| 6 | 3 | 0.18% | 20.50% | Myoglobin                                                  | Nippostrongylus brasiliensis |
| 6 | 2 | 0.18% | 24.40% |                                                            |                              |
| 6 | 5 | 0.18% | 26.40% | C. briggsae CBR-LYS-8 protein                              | Caenorhabditis briggsae      |
| 6 | 5 | 0.18% | 12.20% | hypothetical protein M60.2                                 | Caenorhabditis elegans       |
| 6 | 4 | 0.18% | 19.00% | ACTin family member (act-4)                                | Caenorhabditis elegans       |
| 6 | 6 | 0.18% | 26.70% | cysteine proteinase                                        | Ancylostoma ceylanicum       |
| 6 | 4 | 0.18% | 13.50% | TransThyretin-Related family domain family member (ttr-44) | Caenorhabditis elegans       |
| 6 | 5 | 0.18% | 10.90% |                                                            |                              |
| 6 | 3 | 0.18% | 18.90% |                                                            |                              |
| 6 | 3 | 0.18% | 30.70% |                                                            |                              |

|   |   |       |        |                                                                              |                              |
|---|---|-------|--------|------------------------------------------------------------------------------|------------------------------|
| 6 | 4 | 0.18% | 19.40% | peroxiredoxin                                                                | Haemonchus contortus         |
| 6 | 4 | 0.18% | 51.10% |                                                                              |                              |
| 6 | 3 | 0.18% | 20.20% | Myoglobin                                                                    | Nippostrongylus brasiliensis |
| 6 | 3 | 0.18% | 9.03%  |                                                                              |                              |
| 6 | 2 | 0.18% | 20.80% |                                                                              |                              |
| 6 | 2 | 0.18% | 26.30% | hypothetical protein K02F3.9                                                 | Caenorhabditis elegans       |
| 6 | 4 | 0.18% | 11.30% | secreted protein 4 precursor                                                 | Ancylostoma caninum          |
| 5 | 2 | 0.15% | 21.00% | VITellogenin structural genes (yolk protein genes) family member (vit-6)     | Caenorhabditis elegans       |
| 5 | 2 | 0.15% | 16.30% | secreted protein 5 precursor                                                 | Ancylostoma ceylanicum       |
| 5 | 4 | 0.15% | 6.10%  | Synthetic secondary siRNA-deficient ArGO naute mutant family member (sago-2) | Caenorhabditis elegans       |
| 5 | 4 | 0.15% | 19.10% | calcium-dependent apyrase                                                    | Ostertagia ostertagi         |
| 5 | 4 | 0.15% | 10.10% | c-type lectin 1                                                              | Ancylostoma caninum          |
| 5 | 5 | 0.15% | 17.80% | Aspartyl protease inhibitor                                                  | Ostertagia ostertagi         |

|   |   |       |        |                                                                 |                           |
|---|---|-------|--------|-----------------------------------------------------------------|---------------------------|
| 5 | 2 | 0.15% | 9.20%  | hypothetical protein LOAG_03532                                 | Loa loa                   |
| 5 | 4 | 0.15% | 7.79%  | astacin-like metalloprotease                                    | Haemonchus contortus      |
| 5 | 4 | 0.15% | 11.90% | Hypothetical protein CBG18957                                   | Caenorhabditis briggsae   |
| 5 | 4 | 0.15% | 13.90% | putative retinol-binding protein                                | Heligmosomoides polygyrus |
| 5 | 4 | 0.15% | 4.98%  | hypothetical protein T25C12.3                                   | Caenorhabditis elegans    |
| 5 | 2 | 0.15% | 30.60% | hypothetical protein ZC373.2                                    | Caenorhabditis elegans    |
| 5 | 2 | 0.15% | 10.80% | hypothetical protein Y52B11A.8                                  | Caenorhabditis elegans    |
| 5 | 5 | 0.15% | 19.20% | calcium-activated apyrase                                       | Teladorsagia circumcincta |
| 5 | 2 | 0.15% | 16.30% | putative retinol-binding protein                                | Heligmosomoides polygyrus |
| 5 | 3 | 0.15% | 28.40% |                                                                 |                           |
| 5 | 4 | 0.15% | 43.30% |                                                                 |                           |
| 5 | 4 | 0.15% | 17.60% | C. briggsae CBR-TPI-1 protein                                   | Caenorhabditis briggsae   |
| 4 | 3 | 0.12% | 9.82%  | cyclophilin-type peptidyl-prolyl cis-trans isomerase-15, Bmcp-5 | Brugia malayi             |
| 4 | 2 | 0.12% | 11.90% | excretory/secretory antigen                                     | Ostertagia ostertagi      |



|   |   |       |        |                                                                          |                         |
|---|---|-------|--------|--------------------------------------------------------------------------|-------------------------|
| 4 | 3 | 0.12% | 37.20% |                                                                          |                         |
| 4 | 2 | 0.12% | 25.80% |                                                                          |                         |
| 4 | 2 | 0.12% | 15.60% | hypothetical protein F58B4.4                                             | Caenorhabditis elegans  |
| 4 | 4 | 0.12% | 17.40% | metalloprotease 1 precursor                                              | Ancylostoma ceylanicum  |
| 4 | 4 | 0.12% | 29.70% | hypothetical protein F40A3.3                                             | Caenorhabditis elegans  |
| 4 | 2 | 0.12% | 17.40% | Nematode AStacin protease family member (nas-5)                          | Caenorhabditis elegans  |
| 4 | 4 | 0.12% | 13.40% | C. briggsae CBR-RNR-2 protein                                            | Caenorhabditis briggsae |
| 4 | 2 | 0.12% | 14.10% |                                                                          |                         |
| 4 | 2 | 0.12% | 7.01%  | C. elegans protein F54F11.2b, partially confirmed by transcript evidence | Caenorhabditis elegans  |
| 4 | 3 | 0.12% | 39.40% | Nematode AStacin protease family member (nas-5)                          | Caenorhabditis elegans  |

|   |   |       |        |                                                                  |                           |
|---|---|-------|--------|------------------------------------------------------------------|---------------------------|
| 4 | 2 | 0.12% | 13.50% | C. briggsae CBR-LYS-8 protein                                    | Caenorhabditis briggsae   |
| 4 | 3 | 0.12% | 29.70% |                                                                  |                           |
| 4 | 2 | 0.12% | 22.00% | C. briggsae CBR-TTR-15 protein                                   | Caenorhabditis briggsae   |
| 4 | 3 | 0.12% | 9.35%  | enolase                                                          | Haemonchus contortus      |
| 4 | 3 | 0.12% | 30.40% | Kunitz type serine protease inhibitor                            | Ancylostoma ceylanicum    |
| 4 | 3 | 0.12% | 13.90% | Invertebrate LYSozyme family member (ilys-5)                     | Caenorhabditis elegans    |
| 4 | 4 | 0.12% | 27.10% |                                                                  |                           |
| 4 | 4 | 0.12% | 28.20% | two-domain activation associated secreted protein ASP4 precursor | Ostertagia ostertagi      |
| 4 | 4 | 0.12% | 24.00% | AF273084_zinc metallopeptidase 1                                 | Ancylostoma caninum       |
| 4 | 4 | 0.12% | 31.70% | hypothetical protein M163.8                                      | Caenorhabditis elegans    |
| 3 | 3 | 0.09% | 4.72%  | protein disulfide isomerase                                      | Teladorsagia circumcincta |
| 3 | 2 | 0.09% | 23.70% | Textilinin-2                                                     | Pseudonaja textilis       |

|   |   |       |        |                                                          |                        |
|---|---|-------|--------|----------------------------------------------------------|------------------------|
| 3 | 3 | 0.09% | 31.00% |                                                          |                        |
| 3 | 3 | 0.09% | 29.70% | putative L3 ES protein                                   | Ostertagia ostertagi   |
| 3 | 2 | 0.09% | 5.77%  | Heat Shock Protein family member (hsp-1)                 | Caenorhabditis elegans |
| 3 | 2 | 0.09% | 20.30% | major sperm protein                                      | Dictyocaulus viviparus |
| 3 | 3 | 0.09% | 17.20% | Dipeptidyl Peptidase Four (IV) family member (dpf-6)     | Caenorhabditis elegans |
| 3 | 2 | 0.09% | 28.70% |                                                          |                        |
| 3 | 2 | 0.09% | 17.10% | hypothetical protein F25H2.5                             | Caenorhabditis elegans |
| 3 | 2 | 0.09% | 19.80% |                                                          |                        |
| 3 | 3 | 0.09% | 24.50% | Fatty Acid/Retinol binding protein family member (far-8) | Caenorhabditis elegans |
| 3 | 2 | 0.09% | 39.10% | excretory/secretory antigen                              | Ostertagia ostertagi   |
| 3 | 2 | 0.09% | 33.30% |                                                          |                        |
| 3 | 3 | 0.09% | 9.43%  | secreted protein 4 precursor                             | Ancylostoma caninum    |

|   |   |       |        |                                                 |                          |
|---|---|-------|--------|-------------------------------------------------|--------------------------|
| 3 | 2 | 0.09% | 24.20% | Nematode ASTacin protease family member (nas-5) | Caenorhabditis elegans   |
| 3 | 3 | 0.09% | 19.90% | FerriTiN family member (ftn-2)                  | Caenorhabditis elegans   |
| 3 | 3 | 0.09% | 11.10% | PREDICTED: mannose receptor C type 1-like       | Saccoglossus kowalevskii |
| 3 | 3 | 0.09% | 31.40% | hypothetical protein T25B6.2                    | Caenorhabditis elegans   |
| 3 | 3 | 0.09% | 21.70% | Hypothetical protein CBG06772                   | Caenorhabditis briggsae  |
| 3 | 2 | 0.09% | 11.90% | Hypothetical protein CBG13025                   | Caenorhabditis briggsae  |
| 3 | 2 | 0.09% | 8.61%  | hypothetical protein T19B10.2                   | Caenorhabditis elegans   |
| 3 | 3 | 0.09% | 35.80% | glutathione S-transferase-3                     | Necator americanus       |
| 3 | 2 | 0.09% | 18.90% |                                                 |                          |
| 3 | 3 | 0.09% | 9.79%  | astacin-like metalloprotease                    | Haemonchus contortus     |

|   |   |       |        |                                             |                             |
|---|---|-------|--------|---------------------------------------------|-----------------------------|
| 3 | 3 | 0.09% | 36.80% | Lipid Binding Protein family member (lbp-9) | Caenorhabditis elegans      |
| 3 | 2 | 0.09% | 12.10% | C. briggsae CBR-CYN-3 protein               | Caenorhabditis briggsae     |
| 3 | 2 | 0.09% | 12.60% | Hypothetical protein CBG24261               | Caenorhabditis briggsae     |
| 3 | 2 | 0.09% | 8.06%  | secreted protein 5 precursor                | Ancylostoma ceylanicum      |
| 3 | 2 | 0.09% | 7.01%  | hypothetical protein C06G3.5                | Caenorhabditis elegans      |
| 3 | 3 | 0.09% | 16.90% | C. briggsae CBR-PFN-1 protein               | Caenorhabditis briggsae     |
| 2 | 2 | 0.06% | 5.91%  | parasite pepsinogen                         | Haemonchus contortus        |
| 2 | 2 | 0.06% | 10.40% | putative MFP2                               | Angiostrongylus cantonensis |
| 2 | 2 | 0.06% | 11.80% |                                             |                             |
| 2 | 2 | 0.06% | 7.01%  |                                             |                             |
| 2 | 2 | 0.06% | 31.20% | glutathione S-transferase 2                 | Heligmosomoides polygyrus   |
| 2 | 2 | 0.06% | 4.56%  | protein disulfide isomerase 1               | Ostertagia ostertagi        |

|   |   |       |        |                                                                  |                         |
|---|---|-------|--------|------------------------------------------------------------------|-------------------------|
| 2 | 2 | 0.06% | 7.71%  | antigen h11                                                      | Haemonchus contortus    |
| 2 | 2 | 0.06% | 21.40% | two-domain activation associated secreted protein ASP4 precursor | Ostertagia ostertagi    |
| 2 | 2 | 0.06% | 9.91%  | Dipeptidyl Peptidase Four (IV) family member (dpf-6)             | Caenorhabditis elegans  |
| 2 | 2 | 0.06% | 15.70% | Hypothetical protein CBG05204                                    | Caenorhabditis briggsae |
| 2 | 2 | 0.06% | 23.50% | ProFiliN family member (pfn-1)                                   | Caenorhabditis elegans  |
| 2 | 2 | 0.06% | 7.93%  | legumain                                                         | Haemonchus contortus    |
| 2 | 2 | 0.06% | 13.40% | AF273705_1zinc metallopeptidase 2 MEP2                           | Ancylostoma caninum     |
| 2 | 2 | 0.06% | 14.50% | parasite pepsinogen                                              | Haemonchus contortus    |
| 2 | 2 | 0.06% | 2.96%  | Hypothetical protein CBG20766                                    | Caenorhabditis briggsae |
| 2 | 2 | 0.06% | 14.00% | ancylostoma-secreted protein 1 precursor                         | Ancylostoma duodenale   |
| 2 | 2 | 0.06% | 13.40% |                                                                  |                         |
| 2 | 2 | 0.06% | 22.50% | hypothetical protein ZK856.7                                     | Caenorhabditis elegans  |
| 2 | 2 | 0.06% | 11.60% | C. briggsae CBR-LEC-4 protein                                    | Caenorhabditis briggsae |
| 2 | 2 | 0.06% | 12.60% |                                                                  |                         |
| 2 | 2 | 0.06% | 42.20% | SXC2 protein                                                     | Ostertagia ostertagi    |

|   |   |       |        |                                                           |                           |
|---|---|-------|--------|-----------------------------------------------------------|---------------------------|
| 2 | 2 | 0.06% | 10.90% | C. briggsae CBR-FUM-1 protein                             | Caenorhabditis briggsae   |
| 2 | 2 | 0.06% | 20.60% | macrophage migration inhibitory factor                    | Ancylostoma ceylanicum    |
| 2 | 2 | 0.06% | 4.74%  | glutamate dehydrogenase                                   | Haemonchus contortus      |
| 2 | 2 | 0.06% | 14.80% | TransThyretin-Related family domain family member (ttr-2) | Caenorhabditis elegans    |
| 2 | 2 | 0.06% | 6.07%  | hypothetical protein C04G2.9                              | Caenorhabditis elegans    |
| 2 | 2 | 0.06% | 12.60% | C-type lectin-1                                           | Heligmosomoides polygyrus |
| 2 | 2 | 0.06% | 12.10% | hypothetical protein F48E3.4                              | Caenorhabditis elegans    |
| 2 | 2 | 0.06% | 11.40% | glutathione S-transferase-3                               | Necator americanus        |

|   |   |       |        |                                |                        |
|---|---|-------|--------|--------------------------------|------------------------|
| 2 | 2 | 0.06% | 15.40% | FUMarase family member (fum-1) | Caenorhabditis elegans |
| 2 | 2 | 0.06% | 6.24%  | metalloprotease 1 precursor    | Ancylostoma ceylanicum |
| 2 | 2 | 0.06% | 37.00% | hypothetical protein F42A10.7  | Caenorhabditis elegans |
| 2 | 2 | 0.06% | 21.10% | metalloprotease 1 precursor    | Ancylostoma ceylanicum |
| 2 | 2 | 0.06% | 13.50% | PREDICTED: similar to epithin  | Monodelphis domestica  |



| Accession Number | Closest Blastx Hit eValue | #GOs (Annotated) | GOs (Annotated)                                                                    | #GOs (when mapped but not annotated) | Mapped but not annotated                                                                                                     | Enzyme Codes | InterProScan                                                                           |
|------------------|---------------------------|------------------|------------------------------------------------------------------------------------|--------------------------------------|------------------------------------------------------------------------------------------------------------------------------|--------------|----------------------------------------------------------------------------------------|
| CAO00417.1       | 1.957E-89                 | 0                |                                                                                    | 3                                    | P:GO:0040011; P:GO:0006898; C:GO:0005576                                                                                     |              | IPR001283; IPR002413; IPR014044; IPR018244; PTHR10334:SF11 (PANTHER)                   |
| P27613.1         | 2.936E-30                 | 6                | F:GO:0020037; C:GO:0005576; C:GO:0005737; F:GO:0005344; P:GO:0015671; F:GO:0019825 | -                                    | -                                                                                                                            |              | IPR009548                                                                              |
| AAO63576.1       | 3.028E-26                 | 0                |                                                                                    | 2                                    | P:GO:0040011; C:GO:0005576                                                                                                   |              | IPR001283; IPR014044; PTHR10334:SF11 (PANTHER)                                         |
| P27613.1         | 3.102E-55                 | 6                | F:GO:0020037; C:GO:0005615; C:GO:0005737; F:GO:0005344; P:GO:0015671; F:GO:0019825 | -                                    | -                                                                                                                            |              | IPR000971; IPR009050; IPR012085; IPR012292; SignalP (SIGNALP)                          |
| AAO63578.1       | 8.137E-20                 | 0                |                                                                                    | 2                                    | P:GO:0040011; C:GO:0005576                                                                                                   |              | SignalP (SIGNALP)                                                                      |
| P27613.1         | 3.518E-39                 | 6                | F:GO:0020037; C:GO:0005615; C:GO:0005737; F:GO:0005344; P:GO:0015671; F:GO:0019825 | -                                    | -                                                                                                                            |              | no IPS match                                                                           |
| XP_002634040.1   | 6.073E-37                 | 0                |                                                                                    | 9                                    | F:GO:0045735; F:GO:0005319; F:GO:0008565; P:GO:0006869; P:GO:0009792; C:GO:0005576; P:GO:0006886; P:GO:0008340; P:GO:0040010 |              | no IPS match                                                                           |
| NP_495083.1      | 4.647E-30                 | 1                | F:GO:0005515                                                                       | -                                    | -                                                                                                                            |              | IPR013781; IPR017853; PTHR23208 (PANTHER), PTHR23208:SF13 (PANTHER), SignalP (SIGNALP) |
| NP_509305.1      | 1.001E-45                 | 4                | P:GO:0009792; F:GO:0005515; P:GO:0040010; P:GO:0008340                             | -                                    | -                                                                                                                            |              | IPR015255; IPR015819; PTHR23345 (PANTHER)                                              |
| Q24702.1         | 2.08E-145                 | 1                | F:GO:0008289                                                                       | -                                    | -                                                                                                                            |              | PTHR21693 (PANTHER)                                                                    |
| NP_001123117.1   | 3.69E-53                  | 4                | P:GO:0009792; F:GO:0005515; P:GO:0040010; P:GO:0008340                             | -                                    | -                                                                                                                            |              | IPR001747; IPR015816; IPR015819; PTHR23345 (PANTHER)                                   |
| NP_508612.1      | 3.144E-35                 | 4                | P:GO:0009792; F:GO:0005515; P:GO:0040010; P:GO:0008340                             | -                                    | -                                                                                                                            |              | PTHR23345 (PANTHER)                                                                    |
| XP_002644638.1   | 4.109E-32                 | 4                | P:GO:0009792; F:GO:0005515; P:GO:0040010; P:GO:0008340                             | -                                    | -                                                                                                                            |              | IPR011030; IPR015255; IPR015817; IPR015819; PTHR23345 (PANTHER)                        |
| Q94637.1         | 8.07E-39                  | 6                | P:GO:0009792; F:GO:0005319; F:GO:0005515; P:GO:0040010; P:GO:0006869; P:GO:0008340 | -                                    | -                                                                                                                            |              | no IPS match                                                                           |

|                |           |   |                                                                                          |   |                                                                                                                                          |            |                                                                                                                                                           |
|----------------|-----------|---|------------------------------------------------------------------------------------------|---|------------------------------------------------------------------------------------------------------------------------------------------|------------|-----------------------------------------------------------------------------------------------------------------------------------------------------------|
| Q94637.1       | 5.987E-31 | 4 | P:GO:0009792; F:GO:0005515;<br>P:GO:0040010; P:GO:0008340                                | - | -                                                                                                                                        |            | SignalP (SIGNALP)                                                                                                                                         |
| P27613.1       | 4.944E-56 | 6 | F:GO:0020037; C:GO:0005615;<br>C:GO:0005737; F:GO:0005344;<br>P:GO:0015671; F:GO:0019825 | - | -                                                                                                                                        |            | IPR000971;<br>IPR009050;<br>IPR012085;<br>IPR012292; SignalP<br>(SIGNALP)                                                                                 |
| AAD13339.1     | 0.0001661 | 0 |                                                                                          | 1 | C:GO:0005576                                                                                                                             |            | IPR014044                                                                                                                                                 |
|                |           | 0 |                                                                                          |   |                                                                                                                                          |            | no IPS match                                                                                                                                              |
| AAO63577.1     | 2.788E-38 | 0 |                                                                                          | 4 | F:GO:0009055; P:GO:0019646;<br>P:GO:0006898; C:GO:0005576                                                                                |            | IPR001283;<br>IPR014044;<br>IPR018244;<br>PTHR10334:SF11<br>(PANTHER)                                                                                     |
| Q94637.1       | 3.544E-15 | 6 | P:GO:0009792; F:GO:0005515;<br>P:GO:0006810; P:GO:0040010;<br>P:GO:0033036; P:GO:0008340 | - | -                                                                                                                                        |            | SignalP (SIGNALP)                                                                                                                                         |
| AAS49411.1     | 6.37E-169 | 5 | P:GO:0001507; F:GO:0003990;<br>C:GO:0005623; P:GO:0040012;<br>F:GO:0042803               | - | -                                                                                                                                        | EC:3.1.1.7 | IPR000997;<br>IPR002018;<br>IPR019826;<br>G3DSA:3.40.50.1820<br>(GENE3D),<br>PTHR11559:SF33<br>(PANTHER), SignalP<br>(SIGNALP), SSF53474<br>(SUPERFAMILY) |
| AAO63576.1     | 2.5E-31   | 0 |                                                                                          | 2 | P:GO:0040011; C:GO:0005576                                                                                                               |            | IPR001283;<br>IPR002413;<br>IPR014044;<br>PTHR10334:SF11<br>(PANTHER)                                                                                     |
| AAD31839.1     | 4.282E-49 | 0 |                                                                                          | 3 | P:GO:0040011; P:GO:0006898;<br>C:GO:0005576                                                                                              |            | IPR001283;<br>IPR013032;<br>IPR014044;<br>IPR018244;<br>PTHR10334:SF11<br>(PANTHER), SignalP<br>(SIGNALP)                                                 |
| P51535.1       | 6.905E-58 | 6 | F:GO:0020037; C:GO:0005576;<br>C:GO:0005737; F:GO:0005344;<br>P:GO:0015671; F:GO:0019825 | - | -                                                                                                                                        |            | IPR000971;<br>IPR009050;<br>IPR012085;<br>IPR012292; SignalP<br>(SIGNALP)                                                                                 |
| XP_002641923.1 | 1.076E-79 | 3 | C:GO:0005840; F:GO:0003735;<br>P:GO:0006412                                              | - | -                                                                                                                                        | EC:3.6.5.3 | IPR001747;<br>IPR011030;<br>PTHR23345<br>(PANTHER), SSF48431<br>(SUPERFAMILY)                                                                             |
| XP_002634040.1 | 8.945E-11 | 0 |                                                                                          | 9 | F:GO:0045735; F:GO:0005319;<br>F:GO:0008565; P:GO:0006869;<br>P:GO:0009792; C:GO:0005576;<br>P:GO:0006886; P:GO:0008340;<br>P:GO:0040010 |            | IPR001747;<br>IPR011030; SSF48431<br>(SUPERFAMILY)                                                                                                        |
| CBW38507.1     | 2.36E-89  | 5 | P:GO:0040010; P:GO:0008340;<br>F:GO:0005515; F:GO:0016462;<br>C:GO:0005789               | - | -                                                                                                                                        |            | no IPS match                                                                                                                                              |
| AAL09375.1     | 2.41E-39  | 6 | P:GO:0009792; F:GO:0005319;<br>F:GO:0005515; P:GO:0040010;<br>P:GO:0006869; P:GO:0008340 | - | -                                                                                                                                        |            | IPR015255                                                                                                                                                 |
| CAO00417.1     | 1.272E-17 | 0 |                                                                                          | 2 | P:GO:0040011; C:GO:0005576                                                                                                               |            | IPR001283;<br>IPR014044;<br>PTHR10334:SF9<br>(PANTHER), SignalP<br>(SIGNALP)                                                                              |

|                |           |    |                                                                                                                                                                                       |   |                                                                                          |             |                                                                                                                                                                                   |
|----------------|-----------|----|---------------------------------------------------------------------------------------------------------------------------------------------------------------------------------------|---|------------------------------------------------------------------------------------------|-------------|-----------------------------------------------------------------------------------------------------------------------------------------------------------------------------------|
| ADK47524.1     | 0         | 12 | P:GO:0040010; P:GO:0008340;<br>P:GO:0040035; C:GO:0000015;<br>C:GO:0009986; P:GO:0002119;<br>F:GO:0000287; P:GO:0006096;<br>P:GO:0006898; P:GO:0009792;<br>P:GO:0040018; F:GO:0004634 | - | -                                                                                        | EC:4.2.1.11 | IPR000941;<br>IPR020809;<br>IPR020810;<br>G3DSA:3.20.20.120<br>(GENE3D),<br>PTHR11902<br>(PANTHER), PS51257<br>(PROFILE), SSF51604<br>(SUPERFAMILY),<br>SSF54826<br>(SUPERFAMILY) |
| AAO63576.1     | 5.012E-22 | 0  |                                                                                                                                                                                       | 1 | C:GO:0005576                                                                             |             | IPR001283;<br>IPR014044;<br>PTHR10334:SF11<br>(PANTHER)                                                                                                                           |
|                |           | 0  |                                                                                                                                                                                       |   |                                                                                          |             | SignalP (SIGNALP)                                                                                                                                                                 |
|                |           | 0  |                                                                                                                                                                                       |   |                                                                                          |             | no IPS match                                                                                                                                                                      |
| AAN11402.1     | 4.525E-11 | 0  |                                                                                                                                                                                       | 1 | C:GO:0005576                                                                             |             | IPR014044                                                                                                                                                                         |
| Q24702.1       | 9.32E-133 | 2  | P:GO:0008340; F:GO:0008289                                                                                                                                                            | - | -                                                                                        |             | PTHR21693<br>(PANTHER), SignalP<br>(SIGNALP)                                                                                                                                      |
| XP_002637058.1 | 5.239E-43 | 0  |                                                                                                                                                                                       |   |                                                                                          |             | IPR001534; SignalP<br>(SIGNALP)                                                                                                                                                   |
| ABB53347.1     | 4.151E-10 | 0  |                                                                                                                                                                                       | 1 | C:GO:0005576                                                                             |             | IPR014044                                                                                                                                                                         |
| XP_002641305.1 | 2.209E-33 | 0  |                                                                                                                                                                                       | 1 | P:GO:0016539                                                                             |             | IPR001534; SignalP<br>(SIGNALP)                                                                                                                                                   |
| NP_001123117.1 | 1.222E-07 | 1  | F:GO:0005515                                                                                                                                                                          | - | -                                                                                        |             | no IPS match                                                                                                                                                                      |
|                |           | 0  |                                                                                                                                                                                       |   |                                                                                          |             | no IPS match                                                                                                                                                                      |
| XP_002642775.1 | 2.26E-128 | 4  | C:GO:0044464; F:GO:0005544;<br>F:GO:0005509; F:GO:0005515                                                                                                                             | - | -                                                                                        |             | IPR001464;<br>IPR018252;<br>IPR018502;<br>PTHR10502:SF30<br>(PANTHER)                                                                                                             |
| XP_002634040.1 | 1.562E-23 | 0  |                                                                                                                                                                                       | 6 | P:GO:0006869; F:GO:0005319;<br>F:GO:0045735; P:GO:0006886;<br>C:GO:0005576; F:GO:0008565 |             | IPR001747;<br>IPR015816;<br>IPR015819                                                                                                                                             |
| Q16937.1       | 1.551E-45 | 0  |                                                                                                                                                                                       | 2 | P:GO:0040011; C:GO:0005576                                                               |             | IPR001283;<br>IPR014044;<br>IPR018244;<br>PTHR10334:SF11<br>(PANTHER)                                                                                                             |
| ADN00784.1     | 1.054E-38 | 0  |                                                                                                                                                                                       |   |                                                                                          |             | no IPS match                                                                                                                                                                      |
| XP_002634040.1 | 2.235E-09 | 3  | P:GO:0006810; F:GO:0022892;<br>P:GO:0033036                                                                                                                                           | - | -                                                                                        |             | no IPS match                                                                                                                                                                      |
| AAG29105.1     | 3.599E-85 | 2  | P:GO:0008152; F:GO:0008237                                                                                                                                                            | - | -                                                                                        |             | IPR000718;<br>IPR008753;<br>G3DSA:3.40.390.10<br>(GENE3D),<br>PTHR11733:SF15<br>(PANTHER), SSF55486<br>(SUPERFAMILY)                                                              |
| AAO63578.1     | 0.0004719 | 0  |                                                                                                                                                                                       | 1 | C:GO:0005576                                                                             |             | no IPS match                                                                                                                                                                      |
| Q94637.1       | 4.359E-15 | 5  | P:GO:0006869; F:GO:0005319;<br>P:GO:0006886; F:GO:0008565;<br>F:GO:0005515                                                                                                            | - | -                                                                                        |             | IPR001747;<br>IPR015816;<br>PTHR23345<br>(PANTHER)                                                                                                                                |
| CAR63537.1     | 4.014E-58 | 1  | F:GO:0005515                                                                                                                                                                          | - | -                                                                                        |             | IPR000463;<br>IPR011038;<br>IPR012674;<br>PTHR22725<br>(PANTHER), SignalP<br>(SIGNALP)                                                                                            |

|                |           |   |                                                                                                           |   |                            |             |                                                                                                                                             |
|----------------|-----------|---|-----------------------------------------------------------------------------------------------------------|---|----------------------------|-------------|---------------------------------------------------------------------------------------------------------------------------------------------|
| AAO62949.1     | 3.93E-157 | 5 | P:GO:0001507; F:GO:0003990;<br>C:GO:0005623; P:GO:0040012;<br>F:GO:0042803                                | - | -                          | EC:3.1.1.7  | SignalP (SIGNALP)                                                                                                                           |
| ACO59962.1     | 4.14E-124 | 7 | C:GO:0005737; F:GO:0019904;<br>P:GO:0018991; P:GO:0040010;<br>P:GO:0008340; P:GO:0006898;<br>P:GO:0043053 | - | -                          |             | IPR000308                                                                                                                                   |
| XP_002630817.1 | 6.04E-142 | 3 | F:GO:0005515; F:GO:0005529;<br>P:GO:0000003                                                               | - | -                          |             | IPR001079;<br>IPR008985;<br>IPR013320;<br>PTHR11346:SF29<br>(PANTHER), SignalP<br>(SIGNALP)                                                 |
| NP_001021240.1 | 6.04E-167 | 7 | F:GO:0042802; P:GO:0009792;<br>P:GO:0018991; P:GO:0040010;<br>P:GO:0040011; P:GO:0006096;<br>F:GO:0004332 | - | -                          | EC:4.1.2.13 | IPR000741;<br>IPR013785; SSF51569<br>(SUPERFAMILY)                                                                                          |
| CAD20464.1     | 1.781E-64 | 4 | C:GO:0005576; F:GO:0005504;<br>F:GO:0005515; F:GO:0019841                                                 | - | -                          |             | IPR008632; SignalP<br>(SIGNALP)                                                                                                             |
|                |           | 0 |                                                                                                           |   |                            |             | IPR000436; SignalP<br>(SIGNALP)                                                                                                             |
| AAC31568.1     | 2.832E-66 | 2 | P:GO:0008152; F:GO:0008237                                                                                | - | -                          |             | IPR000718;<br>IPR008753;<br>G3DSA:1.10.1380.10<br>(GENE3D),<br>PTHR11733:SF15<br>(PANTHER), SignalP<br>(SIGNALP), SSF55486<br>(SUPERFAMILY) |
| AAO63578.1     | 5.818E-10 | 0 |                                                                                                           | 2 | P:GO:0040011; C:GO:0005576 |             | IPR014044                                                                                                                                   |
| NP_508612.1    | 2.586E-15 | 4 | P:GO:0009792; F:GO:0005515;<br>P:GO:0040010; P:GO:0008340                                                 | - | -                          |             | IPR001846;<br>PTHR11339<br>(PANTHER),<br>PTHR11339:SF43<br>(PANTHER)                                                                        |
|                |           | 0 |                                                                                                           |   |                            |             | IPR000276                                                                                                                                   |
|                |           | 0 |                                                                                                           |   |                            |             | no IPS match                                                                                                                                |
| 1TW9           | 1.13E-101 | 4 | P:GO:0008340; P:GO:0040010;<br>F:GO:0005515; F:GO:0016740                                                 | - | -                          |             | IPR004045;<br>IPR004046;<br>IPR010987;<br>IPR012335;<br>IPR012336;<br>IPR017933;<br>PTHR11571<br>(PANTHER),<br>PTHR11571:SF6<br>(PANTHER)   |
|                |           | 0 |                                                                                                           |   |                            |             | SignalP (SIGNALP)                                                                                                                           |
| AAL09375.1     | 3.665E-30 | 6 | P:GO:0006869; F:GO:0005319;<br>P:GO:0009792; P:GO:0008340;<br>P:GO:0040010; F:GO:0005515                  | - | -                          |             | IPR000372                                                                                                                                   |
| XP_002647311.1 | 8.59E-37  | 2 | F:GO:0005488; P:GO:0010955                                                                                | - | -                          |             | IPR000215;<br>G3DSA:2.30.39.10<br>(GENE3D),<br>G3DSA:3.30.497.10<br>(GENE3D)                                                                |
| AAC28740.1     | 2.64E-130 | 1 | F:GO:0003824                                                                                              | - | -                          |             | IPR000718;<br>IPR008753;<br>G3DSA:1.10.1380.10<br>(GENE3D),<br>PTHR11733:SF15<br>(PANTHER), SignalP<br>(SIGNALP), SSF55486<br>(SUPERFAMILY) |
| AAO63578.1     | 3.439E-08 | 0 |                                                                                                           | 2 | P:GO:0040011; C:GO:0005576 |             | IPR001283;<br>IPR014044                                                                                                                     |

|                |           |    |                                                                                                                                                                                                                                                                                                                                                                                                                                                                                                                                                                                                                                                                                                                                                                                                  |   |                                                                                    |                                                                                        |
|----------------|-----------|----|--------------------------------------------------------------------------------------------------------------------------------------------------------------------------------------------------------------------------------------------------------------------------------------------------------------------------------------------------------------------------------------------------------------------------------------------------------------------------------------------------------------------------------------------------------------------------------------------------------------------------------------------------------------------------------------------------------------------------------------------------------------------------------------------------|---|------------------------------------------------------------------------------------|----------------------------------------------------------------------------------------|
| CAA26849.1     | 9.487E-13 | 4  | P:GO:0009792; P:GO:0008340; P:GO:0040010; F:GO:0005515                                                                                                                                                                                                                                                                                                                                                                                                                                                                                                                                                                                                                                                                                                                                           | - | -                                                                                  | IPRO11030; SignalP (SIGNALP)                                                           |
| XP_002640959.1 | 0         | 55 | C:GO:0009986; P:GO:0032755; F:GO:0051087; C:GO:0046696; P:GO:0042026; P:GO:0032735; P:GO:0032729; C:GO:0005791; F:GO:0051082; P:GO:0043032; P:GO:0042542; P:GO:0032733; P:GO:0043065; C:GO:0005829; F:GO:0001530; P:GO:0032727; P:GO:0051085; C:GO:0005759; C:GO:0005615; C:GO:0045121; F:GO:0002039; P:GO:0042100; P:GO:0006986; F:GO:0002020; P:GO:0001666; P:GO:0006919; C:GO:0044459; F:GO:0043559; P:GO:0002755; C:GO:0019907; P:GO:0042220; P:GO:0002842; P:GO:0009408; C:GO:0042588; F:GO:0032403; C:GO:0005769; C:GO:0005794; P:GO:0043627; F:GO:0005524; F:GO:0051787; F:GO:0043498; P:GO:0045768; P:GO:0002368; F:GO:0046982; P:GO:0050821; P:GO:0050729; P:GO:0050870; C:GO:0030135; P:GO:0042493; C:GO:0030061; C:GO:0005905; P:GO:0048291; P:GO:0002236; P:GO:0032496; P:GO:0033198 | - | -                                                                                  | SignalP (SIGNALP)                                                                      |
| NP_001028814.1 | 0.0002535 | 0  |                                                                                                                                                                                                                                                                                                                                                                                                                                                                                                                                                                                                                                                                                                                                                                                                  |   |                                                                                    | IPRO00436; IPRO16060; PTHR19325 (PANTHER), PTHR19325:SF51 (PANTHER), SignalP (SIGNALP) |
| AAD13339.1     | 0.0004799 | 0  |                                                                                                                                                                                                                                                                                                                                                                                                                                                                                                                                                                                                                                                                                                                                                                                                  | 1 | C:GO:0005576                                                                       | IPRO14044; SignalP (SIGNALP)                                                           |
| AAO63578.1     | 4.77E-20  | 0  |                                                                                                                                                                                                                                                                                                                                                                                                                                                                                                                                                                                                                                                                                                                                                                                                  | 2 | P:GO:0040011; C:GO:0005576                                                         | SignalP (SIGNALP)                                                                      |
|                |           | 0  |                                                                                                                                                                                                                                                                                                                                                                                                                                                                                                                                                                                                                                                                                                                                                                                                  |   |                                                                                    | SignalP (SIGNALP)                                                                      |
|                |           | 0  |                                                                                                                                                                                                                                                                                                                                                                                                                                                                                                                                                                                                                                                                                                                                                                                                  |   |                                                                                    | SignalP (SIGNALP)                                                                      |
|                |           | 0  |                                                                                                                                                                                                                                                                                                                                                                                                                                                                                                                                                                                                                                                                                                                                                                                                  |   |                                                                                    | no IPS match                                                                           |
| XP_002633697.1 | 5.245E-26 | 6  | F:GO:0030976; C:GO:0016021; P:GO:0009792; P:GO:0008152; F:GO:0000287; F:GO:0016740                                                                                                                                                                                                                                                                                                                                                                                                                                                                                                                                                                                                                                                                                                               | - | -                                                                                  | IPRO14044; SignalP (SIGNALP)                                                           |
| CAP09614.1     | 1.093E-05 | 0  |                                                                                                                                                                                                                                                                                                                                                                                                                                                                                                                                                                                                                                                                                                                                                                                                  |   |                                                                                    | IPRO00436; IPRO16060; SignalP (SIGNALP)                                                |
| NP_001023275.1 | 3.859E-06 | 0  |                                                                                                                                                                                                                                                                                                                                                                                                                                                                                                                                                                                                                                                                                                                                                                                                  | 6 | P:GO:0006869; F:GO:0005319; F:GO:0045735; P:GO:0006886; C:GO:0005576; F:GO:0008565 | IPRO15819; SignalP (SIGNALP)                                                           |
|                |           | 0  |                                                                                                                                                                                                                                                                                                                                                                                                                                                                                                                                                                                                                                                                                                                                                                                                  |   |                                                                                    | no IPS match                                                                           |
| CAT00091.1     | 2.808E-51 | 8  | C:GO:0005737; P:GO:0009792; P:GO:0002119; F:GO:0005515; P:GO:0000003; P:GO:0040011; P:GO:0040007; P:GO:0006898                                                                                                                                                                                                                                                                                                                                                                                                                                                                                                                                                                                                                                                                                   | - | -                                                                                  | no IPS match                                                                           |
|                |           | 0  |                                                                                                                                                                                                                                                                                                                                                                                                                                                                                                                                                                                                                                                                                                                                                                                                  |   |                                                                                    | SignalP (SIGNALP)                                                                      |
|                |           | 0  |                                                                                                                                                                                                                                                                                                                                                                                                                                                                                                                                                                                                                                                                                                                                                                                                  |   |                                                                                    | IPRO00436; IPRO16060; SignalP (SIGNALP)                                                |

|                |           |    |                                                                                                                                                                                                                                                                                    |   |                                                                                                           |            |                                                                                                                                                              |
|----------------|-----------|----|------------------------------------------------------------------------------------------------------------------------------------------------------------------------------------------------------------------------------------------------------------------------------------|---|-----------------------------------------------------------------------------------------------------------|------------|--------------------------------------------------------------------------------------------------------------------------------------------------------------|
| CAR63643.1     | 5.697E-23 | 0  |                                                                                                                                                                                                                                                                                    |   |                                                                                                           |            | no IPS match                                                                                                                                                 |
| BAB59011.1     | 1.776E-50 | 2  | F:GO:0004869; P:GO:0000003                                                                                                                                                                                                                                                         | - | -                                                                                                         |            | no IPS match                                                                                                                                                 |
| XP_002056110.1 | 1.456E-12 | 0  |                                                                                                                                                                                                                                                                                    | 7 | P:GO:0006508; F:GO:0004252;<br>F:GO:0008236; P:GO:0006911;<br>F:GO:0016787; F:GO:0003824;<br>F:GO:0008233 |            | no IPS match                                                                                                                                                 |
| EFO15999.1     | 3.943E-06 | 0  |                                                                                                                                                                                                                                                                                    | 1 | P:GO:0016539                                                                                              |            | IPR001534; SignalP (SIGNALP)                                                                                                                                 |
|                |           | 0  |                                                                                                                                                                                                                                                                                    |   |                                                                                                           |            | SignalP (SIGNALP)                                                                                                                                            |
| AAN11402.1     | 1.861E-23 | 0  |                                                                                                                                                                                                                                                                                    | 3 | P:GO:0040011; P:GO:0006898;<br>C:GO:0005576                                                               |            | IPR001283;<br>IPR014044; SignalP (SIGNALP)                                                                                                                   |
| CBW38507.1     | 1.866E-82 | 8  | P:GO:0040010; P:GO:0008340;<br>F:GO:0004871; P:GO:0043123;<br>F:GO:0017110; F:GO:0005515;<br>P:GO:0008152; C:GO:0005789                                                                                                                                                            | - | -                                                                                                         | EC:3.6.1.6 | IPR009283                                                                                                                                                    |
| P51535.1       | 1.953E-64 | 6  | F:GO:0020037; C:GO:0005615;<br>C:GO:0005737; F:GO:0005344;<br>P:GO:0015671; F:GO:0019825                                                                                                                                                                                           | - | -                                                                                                         |            | IPR009050;<br>IPR012292                                                                                                                                      |
|                |           | 0  |                                                                                                                                                                                                                                                                                    |   |                                                                                                           |            | SignalP (SIGNALP)                                                                                                                                            |
| XP_002630755.1 | 4.177E-60 | 4  | F:GO:0005515; P:GO:0008340;<br>P:GO:0008152; F:GO:0003824                                                                                                                                                                                                                          | - | -                                                                                                         |            | IPR013781;<br>IPR017853;<br>PTHR23208 (PANTHER),<br>PTHR23208:SF13 (PANTHER), SignalP (SIGNALP)                                                              |
| NP_509391.1    | 1.18E-124 | 4  | F:GO:0005488; F:GO:0004519;<br>P:GO:0019538; C:GO:0044424                                                                                                                                                                                                                          | - | -                                                                                                         |            | IPR018998;<br>PTHR12439 (PANTHER), SignalP (SIGNALP),<br>SSF142877 (SUPERFAMILY)                                                                             |
| NP_508841.1    | 0         | 18 | P:GO:0007126; P:GO:0007108;<br>P:GO:0040007; P:GO:0007517;<br>P:GO:0000281; P:GO:0040035;<br>P:GO:0030036; C:GO:0005865;<br>F:GO:0005524; C:GO:0005938;<br>P:GO:0002119; F:GO:0016887;<br>F:GO:0005515; C:GO:0005884;<br>F:GO:0005200; P:GO:0040039;<br>P:GO:0006898; P:GO:0009792 | - | -                                                                                                         |            | IPR004000;<br>IPR004001;<br>IPR020902;<br>G3DSA:2.30.36.70 (GENE3D),<br>G3DSA:3.30.420.40 (GENE3D),<br>G3DSA:3.90.640.10 (GENE3D),<br>SSF53067 (SUPERFAMILY) |
| AAM82155.1     | 5.63E-102 | 7  | P:GO:0009792; P:GO:0002119;<br>F:GO:0008233; F:GO:0005515;<br>P:GO:0040011; P:GO:0040007;<br>P:GO:0006898                                                                                                                                                                          | - | -                                                                                                         |            | IPR000169;<br>IPR000668;<br>IPR013128;<br>IPR015643;<br>G3DSA:3.90.70.10 (GENE3D), SignalP (SIGNALP),<br>SSF54001 (SUPERFAMILY)                              |
| NP_506352.1    | 2.061E-43 | 0  |                                                                                                                                                                                                                                                                                    |   |                                                                                                           |            | IPR001534; SignalP (SIGNALP)                                                                                                                                 |
|                |           | 0  |                                                                                                                                                                                                                                                                                    |   |                                                                                                           |            | no IPS match                                                                                                                                                 |
|                |           | 0  |                                                                                                                                                                                                                                                                                    |   |                                                                                                           |            | no IPS match                                                                                                                                                 |
|                |           | 0  |                                                                                                                                                                                                                                                                                    |   |                                                                                                           |            | no IPS match                                                                                                                                                 |

|                |           |    |                                                                                                                                                                                                        |    |                                                                                                                                                                                                                                                                                                                                                                                                                                 |                                                                                                                                                                |
|----------------|-----------|----|--------------------------------------------------------------------------------------------------------------------------------------------------------------------------------------------------------|----|---------------------------------------------------------------------------------------------------------------------------------------------------------------------------------------------------------------------------------------------------------------------------------------------------------------------------------------------------------------------------------------------------------------------------------|----------------------------------------------------------------------------------------------------------------------------------------------------------------|
| AAT28331.1     | 2.92E-102 | 13 | P:GO:0032872; P:GO:0042744;<br>F:GO:0005515; P:GO:0034101;<br>P:GO:0042267; P:GO:0008283;<br>P:GO:0019430; F:GO:0008379;<br>P:GO:0045454; P:GO:0042345;<br>P:GO:0055114; C:GO:0005634;<br>C:GO:0005739 | -  | -                                                                                                                                                                                                                                                                                                                                                                                                                               | IPR000866;<br>IPR012335;<br>IPR012336;<br>IPR017936;<br>IPR019479;<br>G3DSA:3.30.1020.10<br>(GENE3D),<br>PTHR10681<br>(PANTHER),<br>PTHR10681:SF8<br>(PANTHER) |
|                |           | 0  |                                                                                                                                                                                                        |    |                                                                                                                                                                                                                                                                                                                                                                                                                                 | no IPS match                                                                                                                                                   |
| P51535.1       | 2.143E-71 | 6  | F:GO:0020037; C:GO:0005615;<br>C:GO:0005737; F:GO:0005344;<br>P:GO:0015671; F:GO:0019825                                                                                                               | -  | -                                                                                                                                                                                                                                                                                                                                                                                                                               |                                                                                                                                                                |
|                |           | 0  |                                                                                                                                                                                                        |    |                                                                                                                                                                                                                                                                                                                                                                                                                                 | SignalP (SIGNALP)                                                                                                                                              |
|                |           | 0  |                                                                                                                                                                                                        |    |                                                                                                                                                                                                                                                                                                                                                                                                                                 | SignalP (SIGNALP)                                                                                                                                              |
| NP_497272.1    | 2.604E-26 | 0  |                                                                                                                                                                                                        |    |                                                                                                                                                                                                                                                                                                                                                                                                                                 | no IPS match                                                                                                                                                   |
| AAO63576.1     | 5.229E-32 | 0  |                                                                                                                                                                                                        | 2  | P:GO:0040011; C:GO:0005576                                                                                                                                                                                                                                                                                                                                                                                                      | IPR001283;<br>IPR002413;<br>IPR013032;<br>IPR014044;<br>IPR018244;<br>PTHR10334:SF11<br>(PANTHER), SignalP<br>(SIGNALP)                                        |
| NP_001023275.1 | 4.777E-09 | 0  |                                                                                                                                                                                                        | 7  | P:GO:0006869; F:GO:0005319;<br>P:GO:0006886; F:GO:0045735;<br>F:GO:0005515; C:GO:0005576;<br>F:GO:0008565                                                                                                                                                                                                                                                                                                                       | IPR015816                                                                                                                                                      |
| ABB53347.1     | 4.943E-17 | 0  |                                                                                                                                                                                                        | 3  | P:GO:0040011; P:GO:0006898;<br>C:GO:0005576                                                                                                                                                                                                                                                                                                                                                                                     | IPR014044                                                                                                                                                      |
| NP_490758.1    | 4.132E-96 | 0  |                                                                                                                                                                                                        | 3  | F:GO:0003676; P:GO:0000003;<br>P:GO:0016246                                                                                                                                                                                                                                                                                                                                                                                     | IPR003100;<br>IPR003165;<br>IPR012337;<br>G3DSA:2.170.260.10<br>(GENE3D),<br>PTHR22891<br>(PANTHER),<br>SSF101690<br>(SUPERFAMILY)                             |
| ADG63133.1     | 2.898E-82 | 9  | F:GO:0004871; P:GO:0043123;<br>F:GO:0017110; C:GO:0044446;<br>C:GO:0044425; C:GO:0031090;<br>C:GO:0012505; C:GO:0005783;<br>P:GO:0009191                                                               | -  | -                                                                                                                                                                                                                                                                                                                                                                                                                               | EC:3.6.1.6 IPR009283                                                                                                                                           |
| ADK91433.1     | 2.794E-42 | 0  |                                                                                                                                                                                                        | 27 | F:GO:0001874; P:GO:0050766;<br>F:GO:0001872; F:GO:0005529;<br>P:GO:0016337; P:GO:0008037;<br>P:GO:0032760; F:GO:0003674;<br>F:GO:0030247; C:GO:0016021;<br>P:GO:0006911; C:GO:0016020;<br>P:GO:0006910; P:GO:0002238;<br>F:GO:0030169; F:GO:0008329;<br>F:GO:0004872; P:GO:0008150;<br>P:GO:0006955; F:GO:0005488;<br>P:GO:0007165; C:GO:0009897;<br>P:GO:0001879; P:GO:0001878;<br>C:GO:0005575; F:GO:0001846;<br>P:GO:0002752 | SignalP (SIGNALP)                                                                                                                                              |
| Q95PP1.1       | 1.172E-70 | 3  | C:GO:0005576; F:GO:0008233;<br>F:GO:0019828                                                                                                                                                            | -  | -                                                                                                                                                                                                                                                                                                                                                                                                                               | IPR010480; SignalP<br>(SIGNALP), SSF55149<br>(SUPERFAMILY)                                                                                                     |

|                |           |   |                                                                                                                                          |   |                                             |             |                                                                                                                                                                                                                        |
|----------------|-----------|---|------------------------------------------------------------------------------------------------------------------------------------------|---|---------------------------------------------|-------------|------------------------------------------------------------------------------------------------------------------------------------------------------------------------------------------------------------------------|
| EFO24957.1     | 2.206E-51 | 0 |                                                                                                                                          |   |                                             |             | no IPS match                                                                                                                                                                                                           |
| CAJ43810.1     | 4.23E-167 | 2 | F:GO:0046872; F:GO:0008237                                                                                                               | - | -                                           |             | IPR000859;<br>IPR001506;<br>IPR006026;<br>IPR013032;<br>G3DSA:3.40.390.10<br>(GENE3D),<br>PTHR10127<br>(PANTHER),<br>PTHR10127:SF65<br>(PANTHER), SSF55486<br>(SUPERFAMILY)                                            |
| XP_002637274.1 | 6.6E-142  | 8 | F:GO:0005488; C:GO:0005811;<br>F:GO:0030060; P:GO:0006108;<br>P:GO:0055114; P:GO:0006099;<br>P:GO:0006096; C:GO:0005829                  | - | -                                           | EC:1.1.1.37 | IPR001236;<br>IPR001252;<br>IPR001557;<br>IPR010945;<br>IPR011274;<br>IPR015955;<br>IPR016040;<br>IPR022383; SSF51735<br>(SUPERFAMILY)                                                                                 |
| AAK57805.1     | 1.061E-88 | 4 | C:GO:0005576; F:GO:0005515;<br>F:GO:0019842; F:GO:0005501                                                                                | - | -                                           |             | no IPS match                                                                                                                                                                                                           |
| NP_509919.2    | 0         | 1 | F:GO:0005488                                                                                                                             | - | -                                           |             | IPR001304;<br>IPR002035;<br>IPR013032;<br>IPR016186;<br>IPR016187;<br>G3DSA:3.40.50.410<br>(GENE3D),<br>PTHR22802<br>(PANTHER),<br>PTHR22802:SF6<br>(PANTHER), SSF53300<br>(SUPERFAMILY),<br>SSF57196<br>(SUPERFAMILY) |
| NP_509687.1    | 2.41E-08  | 1 | P:GO:0002119                                                                                                                             | - | -                                           |             | no IPS match                                                                                                                                                                                                           |
| NP_492859.1    | 1.506E-17 | 0 |                                                                                                                                          | 3 | C:GO:0016021; P:GO:0016042;<br>P:GO:0006644 |             | IPR013090;<br>IPR016090; SignalP<br>(SIGNALP)                                                                                                                                                                          |
| CBW38507.1     | 4.979E-89 | 9 | P:GO:0040010; C:GO:0043231;<br>P:GO:0008340; F:GO:0004871;<br>P:GO:0043123; F:GO:0005515;<br>C:GO:0044444; F:GO:0016787;<br>C:GO:0016020 | - | -                                           |             | IPR009283; SignalP<br>(SIGNALP)                                                                                                                                                                                        |
| AAK57805.1     | 8.964E-34 | 2 | F:GO:0005515; F:GO:0008289                                                                                                               | - | -                                           |             | IPR008632; SignalP<br>(SIGNALP)                                                                                                                                                                                        |
|                |           | 0 |                                                                                                                                          |   |                                             |             | SignalP (SIGNALP)                                                                                                                                                                                                      |
|                |           | 0 |                                                                                                                                          |   |                                             |             | no IPS match                                                                                                                                                                                                           |
| XP_002631798.1 | 1.05E-105 | 6 | F:GO:0004807; P:GO:0044283;<br>P:GO:0044249; P:GO:0032787;<br>P:GO:0008610; P:GO:0006007                                                 | - | -                                           | EC:5.3.1.1  | IPR000652;<br>IPR013785;<br>IPR020861                                                                                                                                                                                  |
| XP_001896264.1 | 1.052E-66 | 7 | P:GO:0006457; C:GO:0005788;<br>F:GO:0005515; C:GO:0042470;<br>P:GO:0051169; F:GO:0042277;<br>F:GO:0003755                                | - | -                                           | EC:5.2.1.8  | IPR002130;<br>IPR015891;<br>IPR020892;<br>PTHR11071<br>(PANTHER), SignalP<br>(SIGNALP)                                                                                                                                 |
| CAA86821.1     | 9.927E-74 | 1 | F:GO:0019841                                                                                                                             | - | -                                           |             | no IPS match                                                                                                                                                                                                           |



|                |           |    |                                                                                                                                                        |   |   |             |                                                                                                                                                                                           |
|----------------|-----------|----|--------------------------------------------------------------------------------------------------------------------------------------------------------|---|---|-------------|-------------------------------------------------------------------------------------------------------------------------------------------------------------------------------------------|
|                |           | 0  |                                                                                                                                                        |   |   |             | IPR001283;<br>IPR014044;<br>PTHR10334:SF4<br>(PANTHER)                                                                                                                                    |
|                |           | 0  |                                                                                                                                                        |   |   |             | SignalP (SIGNALP)                                                                                                                                                                         |
| NP_505787.1    | 4.712E-10 | 0  |                                                                                                                                                        |   |   |             | SignalP (SIGNALP)                                                                                                                                                                         |
| AAN11401.1     | 6.69E-139 | 2  | F:GO:0046872; F:GO:0008237                                                                                                                             | - | - |             | IPR000859;<br>IPR001506;<br>IPR006026;<br>IPR006210;<br>IPR013032;<br>G3DSA:3.40.390.10<br>(GENE3D),<br>PTHR10127<br>(PANTHER),<br>PTHR10127:SF65<br>(PANTHER), SSF55486<br>(SUPERFAMILY) |
| NP_001023903.1 | 2.272E-79 | 0  |                                                                                                                                                        |   |   |             | IPR001858;<br>IPR008914;<br>PTHR11362<br>(PANTHER), SignalP<br>(SIGNALP)                                                                                                                  |
| NP_492616.1    | 1.362E-39 | 2  | F:GO:0008233; P:GO:0007413                                                                                                                             | - | - |             | IPR001506;<br>IPR006026;<br>G3DSA:3.40.390.10<br>(GENE3D),<br>PTHR10127<br>(PANTHER),<br>PTHR10127:SF73<br>(PANTHER), SSF55486<br>(SUPERFAMILY)                                           |
| XP_002642568.1 | 1.05E-156 | 9  | C:GO:0005737; P:GO:0009263;<br>P:GO:0006260; F:GO:0046914;<br>F:GO:0005515; P:GO:0055114;<br>P:GO:0051290; P:GO:0009186;<br>F:GO:0004748               | - | - | EC:1.17.4.1 | IPR000358;<br>IPR009078;<br>IPR012348                                                                                                                                                     |
|                |           | 0  |                                                                                                                                                        |   |   |             | no IPS match                                                                                                                                                                              |
| CAR97838.1     | 3.49E-141 | 10 | P:GO:0009056; P:GO:0048856;<br>P:GO:0016486; F:GO:0004222;<br>P:GO:0006508; C:GO:0044444;<br>P:GO:0007275; F:GO:0042803;<br>P:GO:0044237; C:GO:0016020 | - | - | EC:3.4.24.0 | IPR000718;<br>IPR008753;<br>IPR018497;<br>G3DSA:3.40.390.10<br>(GENE3D),<br>PTHR11733:SF15<br>(PANTHER), SSF55486<br>(SUPERFAMILY)                                                        |
| NP_492616.1    | 4.28E-21  | 2  | F:GO:0016787; P:GO:0007413                                                                                                                             | - | - |             | IPR001506;<br>IPR006026;<br>G3DSA:3.40.390.10<br>(GENE3D),<br>PTHR10127<br>(PANTHER),<br>PTHR10127:SF73<br>(PANTHER), SSF55486<br>(SUPERFAMILY)                                           |

|                |           |    |                                                                                                                                                                                       |    |                                                                                                                                                                                                                                                                      |              |                                                                                                                                                                                   |
|----------------|-----------|----|---------------------------------------------------------------------------------------------------------------------------------------------------------------------------------------|----|----------------------------------------------------------------------------------------------------------------------------------------------------------------------------------------------------------------------------------------------------------------------|--------------|-----------------------------------------------------------------------------------------------------------------------------------------------------------------------------------|
| XP_002630755.1 | 7.76E-53  | 7  | P:GO:0009056; P:GO:0005975;<br>F:GO:0043169; F:GO:0005515;<br>P:GO:0008340; F:GO:0003796;<br>P:GO:0043170                                                                             | -  | -                                                                                                                                                                                                                                                                    | EC:3.2.1.17  | IPRO13781;<br>IPRO17853;<br>PTHR23208<br>(PANTHER),<br>PTHR23208:SF13<br>(PANTHER)                                                                                                |
|                |           | 0  |                                                                                                                                                                                       |    |                                                                                                                                                                                                                                                                      |              | no IPS match                                                                                                                                                                      |
| XP_002641305.1 | 1.838E-24 | 0  |                                                                                                                                                                                       | 1  | P:GO:0016539                                                                                                                                                                                                                                                         |              | IPRO01534; SignalP<br>(SIGNALP)                                                                                                                                                   |
| ADK47524.1     | 0         | 12 | P:GO:0040010; P:GO:0008340;<br>P:GO:0040035; C:GO:0000015;<br>C:GO:0009986; P:GO:0002119;<br>F:GO:0000287; P:GO:0006096;<br>P:GO:0006898; P:GO:0009792;<br>P:GO:0040018; F:GO:0004634 | -  | -                                                                                                                                                                                                                                                                    | EC:4.2.1.11  | IPRO00941;<br>IPRO20809;<br>IPRO20810;<br>G3DSA:3.20.20.120<br>(GENE3D),<br>PTHR11902<br>(PANTHER), PSS1257<br>(PROFILE), SSF51604<br>(SUPERFAMILY),<br>SSF54826<br>(SUPERFAMILY) |
| AAD51334.1     | 1.489E-13 | 1  | F:GO:0030414                                                                                                                                                                          | -  | -                                                                                                                                                                                                                                                                    |              | IPRO02223;<br>IPRO20901;<br>PTHR10083<br>(PANTHER),<br>PTHR10083:SF39<br>(PANTHER), SignalP<br>(SIGNALP)                                                                          |
| NP_001024594.1 | 1.602E-44 | 5  | C:GO:0005576; P:GO:0050830;<br>P:GO:0009792; F:GO:0003796;<br>P:GO:0050829                                                                                                            | -  | -                                                                                                                                                                                                                                                                    | EC:3.2.1.17  | IPRO08597;<br>PTHR11195:SF7<br>(PANTHER), SignalP<br>(SIGNALP), SSF53955<br>(SUPERFAMILY)                                                                                         |
|                |           | 0  |                                                                                                                                                                                       |    |                                                                                                                                                                                                                                                                      |              | SignalP (SIGNALP)                                                                                                                                                                 |
| CAO00417.1     | 7.183E-46 | 1  | P:GO:0040011                                                                                                                                                                          | -  | -                                                                                                                                                                                                                                                                    |              | IPRO01283;<br>IPRO02413;<br>IPRO14044;<br>IPRO18244;<br>PTHR10334:SF11<br>(PANTHER), SignalP<br>(SIGNALP)                                                                         |
| AAG29103.2     | 5.901E-52 | 1  | F:GO:0008233                                                                                                                                                                          | -  | -                                                                                                                                                                                                                                                                    |              | IPRO00718;<br>IPRO18497;<br>G3DSA:3.40.390.10<br>(GENE3D),<br>PTHR11733:SF15<br>(PANTHER), SSF55486<br>(SUPERFAMILY)                                                              |
| NP_001024812.1 | 2.043E-07 | 0  |                                                                                                                                                                                       |    |                                                                                                                                                                                                                                                                      |              | no IPS match                                                                                                                                                                      |
| ABC86956.1     | 0         | 4  | P:GO:0045454; F:GO:0003756;<br>C:GO:0016020; C:GO:0005783                                                                                                                             | -  | -                                                                                                                                                                                                                                                                    | EC:5.3.4.1   | no IPS match                                                                                                                                                                      |
| Q90WA0.1       | 4.582E-07 | 0  |                                                                                                                                                                                       | 17 | F:GO:0004222; P:GO:0018298;<br>P:GO:0006810; F:GO:0008270;<br>C:GO:0005792; C:GO:0005578;<br>F:GO:0008237; C:GO:0031012;<br>P:GO:0010951; C:GO:0005576;<br>F:GO:0030414; F:GO:0008233;<br>P:GO:0009405; F:GO:0004867;<br>P:GO:0051604; F:GO:0005488;<br>P:GO:0010466 | no IPS match |                                                                                                                                                                                   |

|             |           |    |                                                                                                                                                                                                                                                                                                                                                                                                                                                                |   |                            |             |                                                                                                                                                                                                                                                                                                        |
|-------------|-----------|----|----------------------------------------------------------------------------------------------------------------------------------------------------------------------------------------------------------------------------------------------------------------------------------------------------------------------------------------------------------------------------------------------------------------------------------------------------------------|---|----------------------------|-------------|--------------------------------------------------------------------------------------------------------------------------------------------------------------------------------------------------------------------------------------------------------------------------------------------------------|
|             |           | 0  |                                                                                                                                                                                                                                                                                                                                                                                                                                                                |   |                            |             | no IPS match                                                                                                                                                                                                                                                                                           |
| CAH23216.1  | 0.0006187 | 0  |                                                                                                                                                                                                                                                                                                                                                                                                                                                                |   |                            |             | no IPS match                                                                                                                                                                                                                                                                                           |
| NP_503068.1 | 0         | 5  | F:GO:0005524; P:GO:0055114;<br>P:GO:0006950; F:GO:0005515;<br>F:GO:0032440                                                                                                                                                                                                                                                                                                                                                                                     | - | -                          | EC:1.3.1.74 | IPR001023;<br>IPR013126;<br>IPR018181;<br>G3DSA:2.60.34.10<br>(GENE3D),<br>G3DSA:3.30.30.30<br>(GENE3D),<br>G3DSA:3.30.420.40<br>(GENE3D),<br>G3DSA:3.90.640.10<br>(GENE3D),<br>PTHR19375:SF1<br>(PANTHER),<br>SSF100920<br>(SUPERFAMILY),<br>SSF100934<br>(SUPERFAMILY),<br>SSF53067<br>(SUPERFAMILY) |
| ABJ97284.1  | 3.579E-60 | 5  | P:GO:0019915; C:GO:0005856;<br>C:GO:0005737; F:GO:0005198;<br>C:GO:0031143                                                                                                                                                                                                                                                                                                                                                                                     | - | -                          |             | IPR000535;<br>IPR008962;<br>PTHR22920<br>(PANTHER)                                                                                                                                                                                                                                                     |
| NP_741242.1 | 1.132E-25 | 1  | F:GO:0008236                                                                                                                                                                                                                                                                                                                                                                                                                                                   | - | -                          |             | no IPS match                                                                                                                                                                                                                                                                                           |
|             |           | 0  |                                                                                                                                                                                                                                                                                                                                                                                                                                                                |   |                            |             | SignalP (SIGNALP)                                                                                                                                                                                                                                                                                      |
| NP_492761.1 | 2.933E-74 | 29 | C:GO:0030027; F:GO:0005515;<br>P:GO:0002762; P:GO:0007155;<br>P:GO:0040007; F:GO:0004550;<br>P:GO:0006898; P:GO:0006241;<br>P:GO:0006355; P:GO:0030819;<br>C:GO:0005882; F:GO:0046872;<br>P:GO:0006165; C:GO:0001726;<br>P:GO:0009792; F:GO:0003677;<br>P:GO:0045618; P:GO:0006183;<br>P:GO:0002119; P:GO:0006228;<br>P:GO:0050679; F:GO:0003700;<br>C:GO:0048471; C:GO:0005886;<br>C:GO:0005634; F:GO:0005524;<br>P:GO:0043066; P:GO:0040035;<br>C:GO:0005739 | - | -                          | EC:2.7.4.6  | IPR001564;<br>IPR023005; SignalP<br>(SIGNALP)                                                                                                                                                                                                                                                          |
|             |           | 0  |                                                                                                                                                                                                                                                                                                                                                                                                                                                                |   |                            |             | no IPS match                                                                                                                                                                                                                                                                                           |
| NP_497273.2 | 3.503E-13 | 0  |                                                                                                                                                                                                                                                                                                                                                                                                                                                                | 1 | F:GO:0008289               |             | IPR008632                                                                                                                                                                                                                                                                                              |
| CAA86821.1  | 9.657E-21 | 1  | F:GO:0019841                                                                                                                                                                                                                                                                                                                                                                                                                                                   | - | -                          |             | no IPS match                                                                                                                                                                                                                                                                                           |
|             |           | 0  |                                                                                                                                                                                                                                                                                                                                                                                                                                                                |   |                            |             | IPR000436                                                                                                                                                                                                                                                                                              |
| AAO63576.1  | 5.463E-19 | 0  |                                                                                                                                                                                                                                                                                                                                                                                                                                                                | 2 | P:GO:0040011; C:GO:0005576 |             | IPR001283;<br>IPR014044;<br>PTHR10334:SF11<br>(PANTHER), SignalP<br>(SIGNALP)                                                                                                                                                                                                                          |

|                |           |   |                                                                                          |    |   |                                                                                                                                                                                                        |                                                                                                                                                               |
|----------------|-----------|---|------------------------------------------------------------------------------------------|----|---|--------------------------------------------------------------------------------------------------------------------------------------------------------------------------------------------------------|---------------------------------------------------------------------------------------------------------------------------------------------------------------|
| NP_492616.1    | 2.473E-29 | 4 | F:GO:0046872; F:GO:0008233;<br>P:GO:0000003; P:GO:0007413                                | -  | - |                                                                                                                                                                                                        | IPR001506;<br>G3DSA:3.40.390.10<br>(GENE3D),<br>PTHR10127<br>(PANTHER),<br>PTHR10127:SF73<br>(PANTHER), SSF55486<br>(SUPERFAMILY)                             |
| NP_491198.1    | 4.638E-46 | 5 | F:GO:0042802; P:GO:0006879;<br>F:GO:0008199; P:GO:0040010;<br>P:GO:0006826               | -  | - |                                                                                                                                                                                                        | no IPS match                                                                                                                                                  |
| XP_002740738.1 | 8.174E-08 | 0 |                                                                                          | 13 |   | C:GO:0009986; F:GO:0004888;<br>C:GO:0016021; F:GO:0005529;<br>P:GO:0006897; C:GO:0005576;<br>P:GO:0007165; F:GO:0004872;<br>P:GO:0009405; P:GO:0008150;<br>P:GO:0007155; F:GO:0005537;<br>F:GO:0005488 | IPR001304;<br>IPR016186;<br>IPR016187;<br>PTHR22802<br>(PANTHER),<br>PTHR22802:SF5<br>(PANTHER), SignalP<br>(SIGNALP)                                         |
| NP_509528.1    | 2.297E-67 | 6 | C:GO:0016021; F:GO:0004222;<br>F:GO:0003676; P:GO:0032259;<br>P:GO:0006508; F:GO:0008168 | -  | - | EC:3.4.24.0;<br>EC:2.1.1.0                                                                                                                                                                             | IPR000718;<br>IPR002052;<br>IPR018497;<br>G3DSA:3.40.390.10<br>(GENE3D),<br>PTHR11733:SF15<br>(PANTHER), SSF55486<br>(SUPERFAMILY)                            |
| XP_002647662.1 | 1.649E-31 | 0 |                                                                                          | 4  |   | P:GO:0006915; F:GO:0030414;<br>F:GO:0004867; C:GO:0005576                                                                                                                                              | IPR002223;<br>IPR020901;<br>PTHR10083<br>(PANTHER),<br>PTHR10083:SF39<br>(PANTHER), SignalP<br>(SIGNALP)                                                      |
| XP_002630572.1 | 5.836E-11 | 0 |                                                                                          |    |   |                                                                                                                                                                                                        | SignalP (SIGNALP)                                                                                                                                             |
| NP_505848.1    | 4.43E-141 | 6 | P:GO:0002009; P:GO:0018996;<br>P:GO:0008340; P:GO:0000003;<br>P:GO:0040010; P:GO:0002119 | -  | - |                                                                                                                                                                                                        | IPR000276; SignalP<br>(SIGNALP)                                                                                                                               |
| ACX53263.1     | 2.447E-48 | 4 | P:GO:0008340; P:GO:0040010;<br>F:GO:0005515; F:GO:0016740                                | -  | - |                                                                                                                                                                                                        | IPR004045;<br>IPR012335;<br>IPR012336;<br>PTHR11571<br>(PANTHER),<br>PTHR11571:SF6<br>(PANTHER)                                                               |
|                |           | 0 |                                                                                          |    |   |                                                                                                                                                                                                        | SignalP (SIGNALP)                                                                                                                                             |
| CAJ43810.1     | 1.96E-160 | 2 | F:GO:0046872; F:GO:0008237                                                               | -  | - |                                                                                                                                                                                                        | IPR001506;<br>IPR006026;<br>IPR013032;<br>G3DSA:3.40.390.10<br>(GENE3D),<br>PTHR10127<br>(PANTHER),<br>PTHR10127:SF65<br>(PANTHER), SSF55486<br>(SUPERFAMILY) |

|                |           |    |                                                                                                                                                                                                                                                                                    |   |                            |            |                                                                                                           |
|----------------|-----------|----|------------------------------------------------------------------------------------------------------------------------------------------------------------------------------------------------------------------------------------------------------------------------------------|---|----------------------------|------------|-----------------------------------------------------------------------------------------------------------|
| NP_001033512.1 | 1.839E-40 | 16 | P:GO:0050872; P:GO:0008340;<br>F:GO:0005515; P:GO:0006469;<br>P:GO:0050873; C:GO:0005829;<br>P:GO:0051384; P:GO:0001816;<br>P:GO:0008284; P:GO:0006631;<br>P:GO:0071285; P:GO:0042493;<br>F:GO:0008289; P:GO:0016481;<br>P:GO:0050729; P:GO:0042632                                | - | -                          |            | no IPS match                                                                                              |
| XP_002638373.1 | 1.887E-79 | 3  | P:GO:0006457; P:GO:0009792;<br>F:GO:0003755                                                                                                                                                                                                                                        | - | -                          | EC:5.2.1.8 | no IPS match                                                                                              |
| XP_002648175.1 | 8.411E-52 | 4  | F:GO:0004519; P:GO:0006449;<br>C:GO:0005634; C:GO:0005739                                                                                                                                                                                                                          | - | -                          |            | IPR006056;<br>IPR006175;<br>IPR013813;<br>IPR019897                                                       |
| ABB53347.1     | 9.284E-16 | 0  |                                                                                                                                                                                                                                                                                    | 2 | P:GO:0006898; C:GO:0005576 |            | IPR014044; SignalP<br>(SIGNALP)                                                                           |
| NP_501087.1    | 1E-153    | 15 | P:GO:0034656; P:GO:0046700;<br>P:GO:0048534; P:GO:0009168;<br>P:GO:0002684; F:GO:0004000;<br>P:GO:0009792; P:GO:0030154;<br>P:GO:0048523; P:GO:0048522;<br>P:GO:0050896; P:GO:0042278;<br>P:GO:0046649; P:GO:0051239;<br>C:GO:0016020                                              | - | -                          | EC:3.5.4.4 | SignalP (SIGNALP)                                                                                         |
| XP_002646204.1 | 5.188E-46 | 18 | P:GO:0009653; P:GO:0008340;<br>P:GO:0003006; P:GO:0048610;<br>C:GO:0015629; P:GO:0007283;<br>P:GO:0040011; P:GO:0048468;<br>C:GO:0005737; P:GO:0051179;<br>F:GO:0003779; P:GO:0045927;<br>P:GO:0009792; P:GO:0008361;<br>P:GO:0007015; P:GO:0048477;<br>P:GO:0007399; P:GO:0000910 | - | -                          |            | no IPS match                                                                                              |
| CAA96571.1     | 4.75E-122 | 4  | P:GO:0008219; F:GO:0016787;<br>F:GO:0005515; P:GO:0040011                                                                                                                                                                                                                          | - | -                          |            | IPR001461;<br>IPR001969;<br>IPR009007;<br>IPR021109;<br>PTHR13683:SF53<br>(PANTHER), SignalP<br>(SIGNALP) |
| CAR63538.1     | 7.07E-103 | 0  |                                                                                                                                                                                                                                                                                    |   |                            |            | IPR021010;<br>SSF141739<br>(SUPERFAMILY)                                                                  |
|                |           | 0  |                                                                                                                                                                                                                                                                                    |   |                            |            | no IPS match                                                                                              |
|                |           | 0  |                                                                                                                                                                                                                                                                                    |   |                            |            | SignalP (SIGNALP)                                                                                         |
| AAF36480.1     | 9.571E-21 | 4  | P:GO:0008340; P:GO:0040010;<br>F:GO:0005515; F:GO:0016740                                                                                                                                                                                                                          | - | -                          |            | IPR004046;<br>IPR010987;<br>IPR017933;<br>PTHR11571<br>(PANTHER),<br>PTHR11571:SF6<br>(PANTHER)           |
| CAD29445.1     | 0         | 8  | P:GO:0006457; C:GO:0005875;<br>F:GO:0008415; F:GO:0016757;<br>C:GO:0005811; P:GO:0045454;<br>F:GO:0003756; C:GO:0005783                                                                                                                                                            | - | -                          | EC:5.3.4.1 | no IPS match                                                                                              |

|                |           |   |                                                                                                                                          |   |                                             |             |                                                                                                                                                          |
|----------------|-----------|---|------------------------------------------------------------------------------------------------------------------------------------------|---|---------------------------------------------|-------------|----------------------------------------------------------------------------------------------------------------------------------------------------------|
| AAV68383.1     | 4.94E-168 | 5 | C:GO:0016021; F:GO:0008237;<br>P:GO:0006508; F:GO:0008270;<br>F:GO:0004177                                                               | - | -                                           | EC:3.4.11.0 | IPR001930;<br>IPR014782;<br>PTHR11533:SF29<br>(PANTHER), SSF55486<br>(SUPERFAMILY),<br>SSF63737<br>(SUPERFAMILY)                                         |
| CAO00417.1     | 2.228E-55 | 1 | P:GO:0040011                                                                                                                             | - | -                                           |             | IPR001283;<br>IPR014044;<br>IPR018244;<br>PTHR10334:SF11<br>(PANTHER)                                                                                    |
| NP_741241.1    | 8.05E-57  | 1 | F:GO:0008236                                                                                                                             | - | -                                           |             | no IPS match                                                                                                                                             |
| XP_002641290.1 | 5.458E-16 | 2 | P:GO:0032502; P:GO:0032501                                                                                                               | - | -                                           |             | IPR002557;<br>G3DSA:2.170.140.10<br>(GENE3D),<br>PTHR11177<br>(PANTHER),<br>PTHR11177:SF37<br>(PANTHER)                                                  |
| NP_493258.1    | 1.287E-42 | 9 | C:GO:0005737; P:GO:0009792;<br>F:GO:0003779; P:GO:0000910;<br>P:GO:0000003; P:GO:0008340;<br>P:GO:0040011; C:GO:0015629;<br>P:GO:0030036 | - | -                                           |             | no IPS match                                                                                                                                             |
| CAJ45481.1     | 7.76E-123 | 8 | C:GO:0005737; P:GO:0009792;<br>F:GO:0008233; P:GO:0040015;<br>C:GO:0045177; C:GO:0043231;<br>P:GO:0000003; P:GO:0006508                  | - | -                                           |             | IPR001096;<br>PTHR12000:SF4<br>(PANTHER), SignalP<br>(SIGNALP)                                                                                           |
| AAG29105.1     | 2.55E-100 | 3 | C:GO:0016021; F:GO:0004222;<br>P:GO:0006508                                                                                              | - | -                                           | EC:3.4.24.0 | IPR000718;<br>IPR018497;<br>G3DSA:3.40.390.10<br>(GENE3D),<br>PTHR11733:SF15<br>(PANTHER), SSF55486<br>(SUPERFAMILY)                                     |
| CAA96571.1     | 5.487E-67 | 4 | P:GO:0008219; F:GO:0016787;<br>F:GO:0005515; P:GO:0040011                                                                                | - | -                                           |             | IPR001461;<br>IPR009007;<br>IPR021109;<br>PTHR13683:SF53<br>(PANTHER)                                                                                    |
| XP_002631588.1 | 0         | 1 | F:GO:0003824                                                                                                                             | - | -                                           |             | IPR000718;<br>IPR008753;<br>IPR018497;<br>G3DSA:3.40.390.10<br>(GENE3D),<br>PTHR11733:SF15<br>(PANTHER), SignalP<br>(SIGNALP), SSF55486<br>(SUPERFAMILY) |
| AAD13339.1     | 4.324E-12 | 0 |                                                                                                                                          | 3 | P:GO:0040011; P:GO:0006898;<br>C:GO:0005576 |             | IPR001283;<br>IPR014044; SignalP<br>(SIGNALP)                                                                                                            |
|                |           | 0 |                                                                                                                                          |   |                                             |             | no IPS match                                                                                                                                             |
| NP_505622.1    | 7.147E-53 | 0 |                                                                                                                                          |   |                                             |             | SignalP (SIGNALP)                                                                                                                                        |
| XP_002641997.1 | 2.272E-50 | 1 | F:GO:0005488                                                                                                                             | - | -                                           |             | IPR001079;<br>IPR008985;<br>IPR013320;<br>PTHR11346:SF2<br>(PANTHER)                                                                                     |
|                |           | 0 |                                                                                                                                          |   |                                             |             | no IPS match                                                                                                                                             |
| CAD20812.1     | 9.479E-05 | 0 |                                                                                                                                          |   |                                             |             | IPR003582                                                                                                                                                |

|                |           |    |                                                                                                                                                                                                                                                                      |   |              |                           |                                                                                                                                                                                                                            |
|----------------|-----------|----|----------------------------------------------------------------------------------------------------------------------------------------------------------------------------------------------------------------------------------------------------------------------|---|--------------|---------------------------|----------------------------------------------------------------------------------------------------------------------------------------------------------------------------------------------------------------------------|
| XP_002642617.1 | 4.97E-127 | 9  | P:GO:0009792; C:GO:0045239;<br>F:GO:0005515; P:GO:0006106;<br>P:GO:0040010; P:GO:0000003;<br>P:GO:0006099; P:GO:0006898;<br>F:GO:0004333                                                                                                                             | - | -            | EC:4.2.1.2                | IPR000362;<br>IPR008948;<br>IPR018951;<br>IPR020557;<br>IPR022761;<br>G3DSA:1.10.40.30<br>(GENE3D),<br>G3DSA:1.20.200.10<br>(GENE3D),<br>PTHR11444<br>(PANTHER),<br>PTHR11444:SF1<br>(PANTHER)                             |
| ACC54555.1     | 1.284E-52 | 16 | P:GO:0035468; P:GO:0042325;<br>P:GO:0006955; P:GO:0009966;<br>P:GO:0002684; P:GO:0042127;<br>P:GO:0051047; P:GO:0032268;<br>F:GO:0004167; P:GO:0048523;<br>P:GO:0048583; N:GO:0035556;<br>P:GO:0006950; P:GO:0033036;<br>F:GO:0005488; P:GO:0048598                  | - | -            | EC:5.3.3.12               | IPR001398;<br>IPR014347;<br>PTHR11954:SF4<br>(PANTHER), SSF55331<br>(SUPERFAMILY)                                                                                                                                          |
| ACT34056.1     | 0         | 17 | P:GO:0000003; F:GO:0070403;<br>F:GO:0070728; F:GO:0004353;<br>P:GO:0040010; C:GO:0005759;<br>F:GO:0043531; F:GO:0005525;<br>C:GO:0005743; P:GO:0006537;<br>P:GO:0007616; F:GO:0004352;<br>P:GO:0019459; P:GO:0055114;<br>F:GO:0019899; F:GO:0005524;<br>P:GO:0032024 | - | -            | EC:1.4.1.3;<br>EC:1.4.1.2 | IPR006095;<br>IPR006096;<br>IPR006097;<br>IPR014362;<br>IPR016040;<br>G3DSA:1.10.287.140<br>(GENE3D),<br>G3DSA:3.40.192.10<br>(GENE3D),<br>PTHR11606<br>(PANTHER), SSF51735<br>(SUPERFAMILY),<br>SSF53223<br>(SUPERFAMILY) |
| NP_499203.1    | 2.339E-52 | 0  |                                                                                                                                                                                                                                                                      |   |              |                           | no IPS match                                                                                                                                                                                                               |
| NP_501838.2    | 3.65E-153 | 0  |                                                                                                                                                                                                                                                                      |   |              |                           | IPR021010;<br>SSF141739<br>(SUPERFAMILY)                                                                                                                                                                                   |
| ACS37721.1     | 1.154E-61 | 1  | F:GO:0005529                                                                                                                                                                                                                                                         | - | -            |                           | IPR001304;<br>IPR016186;<br>IPR016187;<br>PTHR22801<br>(PANTHER),<br>PTHR22801:SF9<br>(PANTHER)                                                                                                                            |
| NP_509267.2    | 3.204E-26 | 0  |                                                                                                                                                                                                                                                                      | 1 | F:GO:0003824 |                           | IPR001254;<br>IPR009003;<br>G3DSA:2.40.10.10<br>(GENE3D),<br>PTHR19355<br>(PANTHER),<br>PTHR19355:SF135<br>(PANTHER), SignalP<br>(SIGNALP)                                                                                 |
| ACX53263.1     | 1.88E-40  | 3  | F:GO:0016740; F:GO:0005515;<br>P:GO:0008340                                                                                                                                                                                                                          | - | -            |                           | IPR004046;<br>IPR010987;<br>IPR017933;<br>PTHR11571<br>(PANTHER),<br>PTHR11571:SF6<br>(PANTHER)                                                                                                                            |

|                |           |    |                                                                                                                                                                                       |    |                                                                                                                                                                                                                                                                      |                                                                                                                                                  |                                                                                                                                                                                           |
|----------------|-----------|----|---------------------------------------------------------------------------------------------------------------------------------------------------------------------------------------|----|----------------------------------------------------------------------------------------------------------------------------------------------------------------------------------------------------------------------------------------------------------------------|--------------------------------------------------------------------------------------------------------------------------------------------------|-------------------------------------------------------------------------------------------------------------------------------------------------------------------------------------------|
| NP_498642.1    | 2.17E-108 | 12 | P:GO:0040010; P:GO:0048873;<br>P:GO:0000003; P:GO:0006108;<br>P:GO:0006099; F:GO:0004333;<br>F:GO:0005515; C:GO:0045239;<br>C:GO:0005759; P:GO:0006898;<br>P:GO:0009792; P:GO:0006106 | -  | -                                                                                                                                                                                                                                                                    | EC:4.2.1.2                                                                                                                                       | IPR000362;<br>IPR008948;<br>IPR022761;<br>G3DSA:1.10.275.10<br>(GENE3D),<br>G3DSA:1.20.200.10<br>(GENE3D),<br>PTHR11444<br>(PANTHER),<br>PTHR11444:SF1<br>(PANTHER), SignalP<br>(SIGNALP) |
| AAN11401.1     | 2.43E-117 | 1  | F:GO:0008233                                                                                                                                                                          | -  | -                                                                                                                                                                                                                                                                    |                                                                                                                                                  | IPR001506;<br>IPR003582;<br>IPR006026;<br>IPR013032;<br>G3DSA:3.40.390.10<br>(GENE3D),<br>PTHR10127<br>(PANTHER),<br>PTHR10127:SF65<br>(PANTHER), SSF55486<br>(SUPERFAMILY)               |
| NP_498341.1    | 2.416E-24 | 0  |                                                                                                                                                                                       |    |                                                                                                                                                                                                                                                                      |                                                                                                                                                  | SignalP (SIGNALP)                                                                                                                                                                         |
| AAN11401.1     | 3.819E-50 | 2  | F:GO:0046872; F:GO:0008237                                                                                                                                                            | -  | -                                                                                                                                                                                                                                                                    |                                                                                                                                                  | IPR000859;<br>IPR013032;<br>PTHR10127<br>(PANTHER),<br>PTHR10127:SF60<br>(PANTHER)                                                                                                        |
| XP_001373707.1 | 2.398E-07 | 0  |                                                                                                                                                                                       | 17 | P:GO:0016477; F:GO:0004252;<br>C:GO:0016021; C:GO:0016020;<br>F:GO:0016787; C:GO:0019897;<br>F:GO:0008236; F:GO:0003824;<br>C:GO:0005576; F:GO:0005044;<br>F:GO:0008233; C:GO:0016323;<br>P:GO:0006508; P:GO:0008152;<br>C:GO:0005887; C:GO:0005886;<br>C:GO:0005615 | IPR001254;<br>IPR001314;<br>IPR009003;<br>IPR018114;<br>G3DSA:2.40.10.10<br>(GENE3D),<br>PTHR19355<br>(PANTHER),<br>PTHR19355:SF174<br>(PANTHER) |                                                                                                                                                                                           |
