# Supplementary material for: Proteomic Analysis of Excretory-Secretory Products of Heligmosomoides polygyrus Assessed with Next-Generation Sequencing Transcriptomic Information
Source: PubMed Central journal article supplement (PMC3201918; doi:10.1371/journal.pntd.0001370), 2011-10-25
Supplement: pntd.0001370.s005.pdf [file pntd.0001370.s005.pdf]

**Table S5.** Enrichment analysis of InterPro domains and families in the ESP dataset versus the transcriptome dataset.

|                 | InterPro  | InterPro Entry Name                                    | FDR      | p-Value  | #Seq ESP | #Seq Total | %ESP  | % Transcriptome | Fold increase |
|-----------------|-----------|--------------------------------------------------------|----------|----------|----------|------------|-------|-----------------|---------------|
| <b>Domains</b>  | IPR014044 | CAP domain                                             | 3.95E-26 | 8.69E-30 | 25       | 136        | 12.02 | 0.40            | 29.7          |
|                 | IPR018497 | Peptidase M13, neprilysin, C-terminal                  | 7.83E-06 | 1.03E-08 | 5        | 13         | 2.4   | 0.04            | 62.1          |
|                 | IPR001747 | Lipid transport protein, N-terminal                    | 1.04E-05 | 1.60E-08 | 5        | 14         | 2.4   | 0.04            | 57.7          |
|                 | IPR008753 | Peptidase M13                                          | 1.96E-05 | 3.45E-08 | 5        | 16         | 2.4   | 0.05            | 50.5          |
|                 | IPR015819 | Lipid transport protein, beta-sheet shell              | 4.12E-05 | 9.05E-08 | 5        | 19         | 2.4   | 0.06            | 42.5          |
|                 | IPR006026 | Peptidase, metallopeptidase                            | 1.10E-04 | 2.91E-07 | 6        | 44         | 2.88  | 0.13            | 22.0          |
|                 | IPR011030 | Vitellinogen, superhelical                             | 1.10E-04 | 2.83E-07 | 4        | 10         | 1.92  | 0.03            | 64.6          |
|                 | IPR001506 | Peptidase M12A, astacin                                | 1.21E-04 | 3.46E-07 | 7        | 73         | 3.37  | 0.22            | 15.5          |
|                 | IPR015816 | Vitellinogen, beta-sheet N-terminal                    | 9.39E-04 | 3.10E-06 | 4        | 17         | 1.92  | 0.05            | 38.0          |
|                 | IPR009050 | Globin-like                                            | 1.13E-03 | 3.96E-06 | 4        | 18         | 1.92  | 0.05            | 35.9          |
|                 | IPR012292 | Globin                                                 | 1.34E-03 | 4.99E-06 | 4        | 19         | 1.92  | 0.06            | 34.0          |
|                 | IPR015255 | Vitellinogen, open beta-sheet                          | 7.52E-03 | 3.64E-05 | 3        | 11         | 1.44  | 0.03            | 44.0          |
|                 | IPR004046 | Glutathione S-transferase, C-terminal                  | 9.55E-03 | 4.83E-05 | 3        | 12         | 1.44  | 0.04            | 40.4          |
|                 | IPR000436 | Sushi/SCR/CCP                                          | 2.37E-02 | 1.30E-04 | 5        | 79         | 2.4   | 0.23            | 10.2          |
|                 | IPR017933 | Glutathione S-transferase/chloride channel, C-terminal | 2.55E-02 | 1.46E-04 | 3        | 17         | 1.44  | 0.05            | 28.5          |
| <b>Families</b> | IPR001283 | Allergen V5/Tpx-1-related                              | 1.77E-19 | 7.80E-23 | 18       | 86         | 8.65  | 0.26            | 33.8          |
|                 | IPR000718 | Peptidase M13, neprilysin                              | 4.06E-09 | 3.57E-12 | 8        | 27         | 3.85  | 0.08            | 48.0          |
|                 | IPR002413 | Ves allergen                                           | 3.47E-07 | 3.81E-10 | 6        | 16         | 2.88  | 0.05            | 60.6          |
|                 | IPR012085 | Globin, nematode                                       | 3.16E-03 | 1.25E-05 | 3        | 8          | 1.44  | 0.02            | 60.6          |
|                 | IPR008632 | Nematode fatty acid retinoid binding                   | 4.47E-03 | 1.87E-05 | 3        | 9          | 1.44  | 0.03            | 53.8          |
|                 | IPR001534 | Transthyretin-like                                     | 4.70E-03 | 2.07E-05 | 5        | 54         | 2.4   | 0.16            | 15.0          |
|                 | IPR009283 | Apyrase                                                | 7.52E-03 | 3.64E-05 | 3        | 11         | 1.44  | 0.03            | 44.0          |
|                 | IPR000971 | Globin, subset                                         | 1.87E-02 | 9.85E-05 | 3        | 15         | 1.44  | 0.04            | 32.3          |

Fisher's exact test with testing correction using False Discovery Rate (FDR) values <0.05 were used to identify enriched Interpro domains and families in the ESP when compared to the total transcriptome annotation.
