# Supplementary material for: Proteomic Analysis of Excretory-Secretory Products of Heligmosomoides polygyrus Assessed with Next-Generation Sequencing Transcriptomic Information
Source: PLoS Negl Trop Dis. 2011 Oct 25;5(10):e1370. doi: 10.1371/journal.pntd.0001370 (PMC3201918; doi:10.1371/journal.pntd.0001370)
Supplement: Table S1 — Proteins identified in H. polygyrus ESP through search in UniProt database taxon identifier 6231, Nematoda. (PDF) [file pntd.0001370.s001.pdf]

**Table S1. Proteins identified in *H. polygyrus* ESP through search in UniProt database taxon identifier 6231, Nematoda.**

| Protein name                                                                                                | Uniprot Protein accession numbers                                                                        | Protein molecular weight (kDa) | Protein identification probability | Number of unique peptides | Number of total spectra | Percentage of total spectra | Percentage sequence coverage |
|-------------------------------------------------------------------------------------------------------------|----------------------------------------------------------------------------------------------------------|--------------------------------|------------------------------------|---------------------------|-------------------------|-----------------------------|------------------------------|
| GLB2_NIPBR Myoglobin OS=Nippostrongylus brasiliensis GN=GLBB PE=2 SV=1 6231                                 | P51535                                                                                                   | 17.3                           | 100.00%                            | 3                         | 4                       | 0.03%                       | 19.50%                       |
| A8XPS2_CAEBR C. briggsae CBR-VIT-1 protein OS=Caenorhabditis briggsae GN=cbr-vit-1 PE=4 SV=1 6231           | A8XPS2                                                                                                   | 187.9                          | 99.80%                             | 2                         | 12                      | 0.09%                       | 1.18%                        |
| C7TNU5_9BILA Putative Heat Shock Protein (Fragment) OS=Angiostrongylus cantonensis GN=hsp-60 PE=2 SV=1 6231 | C7TNU5                                                                                                   | 44.1                           | 99.80%                             | 2                         | 2                       | 0.02%                       | 6.01%                        |
| Q6JKL1_MELIC 14-3-3b protein OS=Meloidogyne incognita PE=2 SV=1 6231                                        | Q6JKL1                                                                                                   | 28.6                           | 100.00%                            | 4                         | 9                       | 0.07%                       | 21.90%                       |
| A8X7W5_CAEBR Fructose-bisphosphate aldolase OS=Caenorhabditis briggsae GN=cbr-ald-2 PE=3 SV=1 6231          | A8X7W5                                                                                                   | 38.9                           | 100.00%                            | 3                         | 4                       | 0.03%                       | 14.50%                       |
| A7XXV6_BURXY Actin OS=Bursaphelenchus xylophilus PE=2 SV=1 6231                                             | A7XXV6,B0LJD2,D1MBR7,D1MX15,P10983,Q6A8K1,Q8MTG0,Q95ZL1                                                  | 41.8                           | 100.00%                            | 5                         | 6                       | 0.05%                       | 22.60%                       |
| A8PKM4_BRUMA Triosephosphate isomerase OS=Brugia malayi GN=Bm1_29130 PE=3 SV=1 6231                         | A8PKM4                                                                                                   | 27.1                           | 100.00%                            | 3                         | 4                       | 0.03%                       | 13.80%                       |
| D3KZ67_NIPBR Vitellogenin-1 (Fragment) OS=Nippostrongylus brasiliensis GN=vit-1 PE=2 SV=1 6231              | D3KZ67                                                                                                   | 14.9                           | 100.00%                            | 2                         | 8                       | 0.06%                       | 10.20%                       |
| D3KZ66_NIPBR Major sperm protein 1 (Fragment) OS=Nippostrongylus brasiliensis GN=msp1 PE=2 SV=1 6231        | D3KZ66                                                                                                   | 13.2                           | 99.80%                             | 2                         | 3                       | 0.02%                       | 24.80%                       |
| Q23426_CAEL Galectin LEC-5 OS=Caenorhabditis elegans GN=lec-5 PE=1 SV=2 6231                                | Q23426                                                                                                   | 35.4                           | 99.90%                             | 2                         | 2                       | 0.02%                       | 6.05%                        |
| ENO_CAEL Enolase OS=Caenorhabditis elegans GN=enol-1 PE=1 SV=3 6231                                         | Q27527                                                                                                   | 46.6                           | 100.00%                            | 5                         | 6                       | 0.05%                       | 19.60%                       |
| Q8WQ12_OSTOS Putative ES protein F7 (Fragment) OS=Ostertagia ostertagi PE=2 SV=1 6231                       | Q8WQ12                                                                                                   | 19.8                           | 99.80%                             | 2                         | 4                       | 0.03%                       | 14.90%                       |
| A8X3V3_CAEBR Peptidyl-prolyl cis-trans isomerase OS=Caenorhabditis briggsae GN=CBG07031 PE=3 SV=1 6231      | A8X3V3                                                                                                   | 18.6                           | 99.80%                             | 2                         | 3                       | 0.02%                       | 15.10%                       |
| Q95WS8_HAECO Vitellogenin (Fragment) OS=Haemonchus contortus GN=VIT PE=2 SV=1 6231                          | Q95WS8                                                                                                   | 24.6                           | 99.80%                             | 2                         | 6                       | 0.05%                       | 5.29%                        |
| Q962H2_9BILA Putative retinol-binding protein OS=Heligmosomoides polygyrus PE=2 SV=1 6231                   | Q962H2                                                                                                   | 19.4                           | 100.00%                            | 5                         | 6                       | 0.05%                       | 38.80%                       |
| Q2HZY3_9BILA Protein disulfide isomerase (Fragment) OS=Teladorsagia circumcincta PE=2 SV=1 6231             | Q2HZY3,Q95PP0                                                                                            | 55.0                           | 100.00%                            | 2                         | 2                       | 0.02%                       | 3.85%                        |
| A8NSV0_BRUMA Ubiquitin, putative OS=Brugia malayi GN=Bm1_09050 PE=4 SV=1 6231                               | A8NSV0,A8PH75,A8PII9,A8QFW7,A8X7Y8,A8XMR9,B3GD96,P0CG71,P49632,Q25400,Q45UA3,Q8MYQ4,Q8T4K9,Q8T4L0,Q8T4L5 | 29.1                           | 99.90%                             | 2                         | 2                       | bl                          | 6.98%                        |
| A8X890_CAEBR C. briggsae CBR-FUM-1 protein OS=Caenorhabditis briggsae GN=cbr-fum-1 PE=4 SV=1 6231           | A8X890,O17214                                                                                            | 53.6                           | 99.80%                             | 2                         | 2                       | 0.02%                       | 5.99%                        |
| Q9NJQ6_9BILA Glutathione S-transferase 2 (Fragment) OS=Heligmosomoides polygyrus PE=1 SV=1 6231             | Q9NJQ6                                                                                                   | 23.1                           | 100.00%                            | 7                         | 8                       | 0.06%                       | 52.50%                       |
| Q6J3P3_HAECO Peroxiredoxin OS=Haemonchus contortus PE=2 SV=1 6231                                           | Q6J3P3                                                                                                   | 21.9                           | 100.00%                            | 4                         | 6                       | 0.05%                       | 21.40%                       |
