# Supplementary material for: Proteomic Analysis of Excretory-Secretory Products of Heligmosomoides polygyrus Assessed with Next-Generation Sequencing Transcriptomic Information
Source: PLoS Negl Trop Dis. 2011 Oct 25;5(10):e1370. doi: 10.1371/journal.pntd.0001370 (PMC3201918; doi:10.1371/journal.pntd.0001370)
Supplement: Table S4 — Enrichment analysis of GO terms in the ESP dataset when compared to the transcriptome dataset. (PDF) [file pntd.0001370.s004.pdf]

**Table S4.** Enrichment analysis of GO terms in the ESP dataset when compared to the transcriptome dataset.

|                           | GO         | Name                                                | FDR     | FWER    | p-Value | # Seq<br>ESP | #Seqs<br>Total | % ESP | %Transc<br>riptome | Fold<br>increase |
|---------------------------|------------|-----------------------------------------------------|---------|---------|---------|--------------|----------------|-------|--------------------|------------------|
| <b>Molecular Function</b> | GO:0005344 | oxygen transporter activity                         | 2.4E-07 | 1.2E-07 | 3.9E-10 | 7            | 16             | 6.2   | 0.1                | 55.8             |
|                           | GO:0019825 | oxygen binding                                      | 5.2E-07 | 6.4E-07 | 2.4E-09 | 7            | 22             | 6.2   | 0.2                | 40.6             |
|                           | GO:0008233 | peptidase activity                                  | 4.9E-06 | 7.4E-06 | 1.9E-08 | 20           | 544            | 17.7  | 3.8                | 4.7              |
|                           | GO:0008289 | lipid binding                                       | 2.0E-04 | 3.4E-04 | 8.6E-07 | 10           | 156            | 8.8   | 1.1                | 8.2              |
|                           | GO:0005501 | retinoid binding                                    | 2.8E-04 | 6.4E-04 | 1.8E-06 | 4            | 8              | 3.5   | 0.1                | 63.8             |
|                           | GO:0019840 | isoprenoid binding                                  | 4.5E-04 | 1.1E-03 | 2.7E-06 | 4            | 9              | 3.5   | 0.1                | 56.7             |
|                           | GO:0008237 | metallopeptidase activity                           | 5.2E-04 | 1.4E-03 | 3.9E-06 | 10           | 186            | 8.8   | 1.3                | 6.9              |
|                           | GO:0020037 | heme binding                                        | 5.2E-04 | 1.6E-03 | 4.4E-06 | 7            | 76             | 6.2   | 0.5                | 11.7             |
|                           | GO:0046906 | tetrapyrrole binding                                | 1.0E-03 | 3.3E-03 | 9.5E-06 | 7            | 86             | 6.2   | 0.6                | 10.4             |
|                           | GO:0005506 | iron ion binding                                    | 3.7E-03 | 1.3E-02 | 4.0E-05 | 8            | 150            | 7.1   | 1.0                | 6.8              |
|                           | GO:0019841 | retinol binding                                     | 3.9E-03 | 1.5E-02 | 4.1E-05 | 3            | 6              | 2.7   | 0.0                | 63.8             |
|                           | GO:0070011 | peptidase activity, acting on L-amino acid peptides | 2.5E-02 | 1.1E-01 | 2.1E-04 | 12           | 427            | 10.6  | 3.0                | 3.6              |
|                           | GO:0016860 | intramolecular oxidoreductase activity              | 2.5E-02 | 1.1E-01 | 2.1E-04 | 4            | 33             | 3.5   | 0.2                | 15.5             |
|                           | GO:0009132 | nucleoside diphosphate metabolic process            | 2.5E-02 | 1.2E-01 | 2.1E-04 | 3            | 12             | 2.7   | 0.1                | 31.9             |
| <b>Biological Process</b> | GO:0008340 | determination of adult lifespan                     | 1.2E-07 | 3.0E-08 | 0.0E+00 | 28           | 613            | 24.8  | 4.3                | 5.8              |
|                           | GO:0015671 | oxygen transport                                    | 4.1E-07 | 3.1E-07 | 1.0E-09 | 7            | 19             | 6.2   | 0.1                | 47.0             |
|                           | GO:0015669 | gas transport                                       | 5.2E-07 | 6.4E-07 | 2.4E-09 | 7            | 22             | 6.2   | 0.2                | 40.6             |
|                           | GO:0032501 | multicellular organismal process                    | 2.8E-04 | 5.6E-04 | 1.8E-06 | 33           | 1730           | 29.2  | 12.0               | 2.4              |
|                           | GO:0040010 | positive regulation of growth rate                  | 1.4E-02 | 5.9E-02 | 1.3E-04 | 26           | 1487           | 23.0  | 10.3               | 2.2              |
|                           | GO:0040009 | regulation of growth rate                           | 1.4E-02 | 5.9E-02 | 1.3E-04 | 26           | 1489           | 23.0  | 10.3               | 2.2              |
|                           | GO:0045927 | positive regulation of growth                       | 2.9E-02 | 1.4E-01 | 3.4E-04 | 27           | 1675           | 23.9  | 11.6               | 2.1              |
|                           | GO:0040008 | regulation of growth                                | 4.1E-02 | 2.0E-01 | 4.0E-04 | 28           | 1784           | 24.8  | 12.4               | 2.0              |

Summary of the ESP gene ontology (GO) terms enrichment analysis using the statistical framework GOSSIP feature of BLAST2GO. Fisher's exact test with testing correction using False Discovery Rate (FDR) values of 0.05 to identify enriched GO terms in the ESP when compared to the total transcriptome annotation.
